## **GLI transcriptional repression regulates tissue-specific enhancer activity in response to Hedgehog signaling**

Rachel K. Lex\*<sup>1</sup>, Zhicheng Ji\*<sup>2</sup>, Kristin N. Falkenstein\*<sup>1</sup>, Weiqiang Zhou<sup>2</sup>,  
Joanna L. Henry<sup>1</sup>, Hongkai Ji<sup>2</sup> and Steven A. Vokes<sup>1+</sup>

<sup>1</sup>Department of Molecular Biosciences, University of Texas at Austin, 100 E 24th Street Stop A5000, Austin, TX 78712 USA

<sup>2</sup>Department of Biostatistics, Johns Hopkins Bloomberg School of Public Health, 615 North Wolfe Street, Room E3638, Baltimore, MD 21205, USA

\*Contributed equally to this manuscript

+Corresponding author

Email: [svokes@austin.utexas.edu](mailto:svokes@austin.utexas.edu)

Phone: +1 512-232-8359

## 1 **ABSTRACT**

2 Transcriptional repression needs to be rapidly reversible during embryonic  
3 development. This extends to the Hedgehog pathway, which primarily serves to counter  
4 GLI repression by processing GLI proteins into transcriptional activators. In investigating  
5 the mechanisms underlying GLI repression, we find that a subset of these regions,  
6 termed HH-responsive enhancers, specifically loses acetylation in the absence of HH  
7 signaling. These regions are highly enriched around HH target genes and primarily drive  
8 HH-specific limb activity. They also retain H3K27ac enrichment in limb buds devoid of  
9 GLI activator and repressor, indicating that their activity is primarily regulated by GLI  
10 repression. The Polycomb repression complex is not active at most of these regions,  
11 suggesting it is not a major mechanism of GLI repression. We propose a model for  
12 tissue-specific enhancer activity in which an HDAC-associated GLI repression complex  
13 regulates target gene expression by altering the acetylation status at enhancers.

14

## 15 **INTRODUCTION**

16 Transcriptional repressors employ distinct mechanisms for regulating gene expression.  
17 Long-term repression is accompanied by topological and biochemical changes to DNA  
18 that can lock down transcription within a cell lineage. In contrast, transient repression is  
19 rapidly reversible, providing a mechanism for controlling gene activation during the  
20 dynamic process of embryogenesis. This control is especially important for spatially  
21 restricting gene expression until signal transduction mechanisms alleviate repressor  
22 activity.

23

24 For example, the induction of HH signaling within the posterior half of the developing  
25 limb bud rapidly inhibits the formation of truncated GLI repressor proteins, instead  
26 promoting the production of full-length GLI transcriptional activators (Harfe et al. 2004).  
27 Consequently, GLI activators are found within the posterior limb bud in cells receiving  
28 the HH ligand while GLI repressors in the anterior limb bud spatially restrict the domains  
29 of HH target gene expression (Wang et al. 2000; Ahn and Joyner 2004). As a repressor-  
30 driven system, most transcriptional targets do not actually require GLI activator for  
31 transcription, but can be activated by loss of GLI repressor alone. This property of de-  
32 repression rather than activation is exemplified by *Shh*<sup>-/-</sup> limb buds (constitutive GLI  
33 repression, no GLI activation), which have a nearly complete absence of digits and a  
34 severe reduction in limb size. The phenotype is markedly improved in double mutants  
35 that lack most or all GLI activity (Litingtung et al. 2002; te Welscher et al. 2002;  
36 Wijgerde et al. 2002; Bai et al. 2004; Bowers et al. 2012). In particular, GLI de-  
37 repression is sufficient to activate most GLI target genes in the limb bud, suggesting  
38 that the primary role of the HH pathway is to alleviate GLI repression (Lewandowski et  
39 al. 2015). The labile nature of GLI repression represents a key mechanism for the  
40 dynamic transcriptional regulation of HH targets as HH induction rapidly inactivates GLI  
41 repression, resulting in transcription of targets within 4-9 hours of stimulation (Harfe et  
42 al. 2004; Panman et al. 2006).

43

44 The mechanism underlying GLI repression is unknown but could in principle function  
45 either by excluding GLI activator binding or by recruiting co-repressors (Wang et al.  
46 2010). Although the former category provides an attractive model for how GLI proteins

47 might interpret gradients of HH ligand (Falkenstein and Vokes 2014), it fails to account  
48 for the large number of GLI target genes that are fully activated upon de-repression in  
49 the absence of HH signaling.

50

51 Several GLI co-repressors have been identified in various contexts, including Atrophia  
52 (Zhang et al. 2013), Ski (Dai et al. 2002) and tissue-specific transcription factors  
53 (Oosterveen et al. 2012). Members of the BAF chromatin remodeling complex have also  
54 been shown to regulate GLI repressor activity; however, as these mutations also affect  
55 GLI-activation, it is unclear if they specifically mediate repressive activity or if they are  
56 essential for all GLI transcriptional response (Jagani et al. 2010; Zhan et al. 2011; Jeon  
57 and Seong 2016; Shi et al. 2016). Additionally, GLI activators have been shown to  
58 recruit the histone-demethylase JMJD3 to remove H3K27Me3, a mark that is placed by  
59 the Polycomb Repressor Complex 2 (PRC2), leading to subsequent activation (Shi et al.  
60 2014; Weiner et al. 2016). Other studies have also suggested interactions between  
61 Polycomb repression and HH signaling in the limb bud (Wyngaarden et al. 2011;  
62 Deimling et al. 2018). Because mutations in these candidates are pleiotropic, it has  
63 been challenging to determine if they directly mediate GLI repression, a task  
64 compounded by the dual roles of GLI proteins as transcriptional activators and  
65 repressors.

66

67 We have used a genomic approach to determine if the chromatin modifications at GLI  
68 binding regions (GBRs) are altered in response to GLI repression. We hypothesized  
69 that GLI repressors regulate gene expression by inactivating enhancer activity.

70 Consistent with this, we find that GLI repression regulates enhancer activity through the  
71 de-acetylation of Histone H3K27. This repression occurs independently of Polycomb  
72 activity. Enhancers regulated in this fashion mark known GLI limb enhancers, are highly  
73 enriched around HH-responsive genes, and primarily drive tissue-specific enhancer  
74 activity within HH-specific domains. Collectively, the results suggest that GLI repressors  
75 inhibit gene expression by altering enhancer activity, providing an explanation for the  
76 labile nature of GLI repression.

77

## 78 **RESULTS**

### 79 **A subset of GLI binding regions is epigenetically regulated by HH signaling**

80 Since most HH targets can be activated by loss of GLI repression, we hypothesized that  
81 enhancers may be activated by HH signaling when GLI repression is relieved.

82 To test this, we first identified active GLI enhancers in the developing limb at embryonic  
83 day 10.5 (E10.5), when high levels of HH target gene expression are observed. We  
84 used an endogenously FLAG tagged *Gli3* allele to identify GLI3 binding regions and  
85 then identified regions enriched for H3K27ac, a marker associated with active  
86 enhancers, by chromatin immunoprecipitation (ChIP-seq) (Heintzman et al. 2007;  
87 Heintzman et al. 2009; Creighton et al. 2010; Rada-Iglesias et al. 2011; Cotney et al.  
88 2012; Lopez-Rios et al. 2014; Lorberbaum et al. 2016). Altogether we identified 7,282  
89 endogenous GLI3 binding regions (GBRs), with the majority of regions enriched for  
90 H3K27ac (83%) (Fig. 1A; Figure 1-Source Data 1).

91

92 Next, we assessed changes in H3K27ac enriched GBRs in wild-type (WT) and *Sonic*

93 *hedgehog* (*Shh*) null forelimbs. Since *Shh*<sup>-/-</sup> forelimbs have constitutive GLI repression,  
94 we hypothesized that in the absence of HH signaling, GLI repressor may prevent  
95 activation of its enhancers. We performed CHIP-seq for H3K27ac in E10.5 forelimbs,  
96 prior to overt phenotypes in *Shh* nulls (Chiang et al. 2001). Although most H3K27ac  
97 enriched regions were present in both WT and *Shh*<sup>-/-</sup> embryos, a subset of 2,113 WT  
98 H3K27ac enriched regions had acetylation that was significantly reduced or completely  
99 lost in the absence of HH signaling (Figure 1-Source Data 2). We then asked whether  
100 those regions with reduced acetylation in the absence of HH signaling include GLI-  
101 bound enhancers. Most GBRs with H3K27ac enrichment in WT limbs retain H3K27ac in  
102 *Shh*<sup>-/-</sup> limb buds, which we term Stable GBRs (Fig. 1C,D). This suggests that they  
103 function as active enhancers whose activity is not predominantly regulated by HH  
104 signaling. Interestingly, in a smaller subset of GBRs, H3K27ac enrichment was reduced  
105 or lost in the absence of HH signaling, suggesting that GLI repressor may regulate the  
106 activity of this group of enhancers. Within this GBR class with HH-responsive  
107 acetylation, we identified populations of GBRs that had either significant reductions  
108 (termed HH-sensitive) or a complete absence of H3K27ac enrichment (termed HH-  
109 dependent) in *Shh*<sup>-/-</sup> limb buds (Fig. 1C,D). The latter two categories are henceforth  
110 collectively referred to as HH-responsive GBRs.

111

### 112 **Hedgehog-responsive GBRs are enriched near Hedgehog target genes**

113 To determine if HH-responsive GBRs are associated with HH target genes, we  
114 examined biologically validated GLI enhancers in the *Ptch1* and *Gremlin* loci that  
115 mediate limb-specific transcription of these HH targets and found that they are among

116 the HH-responsive class of GBRs (Fig. 1E) (Vokes et al. 2008; Zuniga et al. 2012; Li et  
117 al. 2014; Lopez-Rios et al. 2014). This suggests that HH-responsive enhancers may  
118 regulate limb-specific gene expression in response to HH signaling. Consistent with this  
119 possibility, we found that HH-responsive GBRs are highly enriched around genes that  
120 have reduced expression in *Shh*<sup>-/-</sup> limb buds (Lewandowski et al. 2015). In contrast,  
121 Stable GBRs have minimal enrichment, however are still significantly enriched around  
122 both HH target and non-target genes (p=0, permutation test; Fig. 1G).

123  
124 As many HH-responsive H3K27ac regions are not bound by GLI3, we asked if they  
125 clustered near GBRs. HH-responsive non-GLI binding regions are significantly clustered  
126 around HH-responsive GBRs, and to a lesser extent, near Stable GBRs (Figure 1-  
127 Figure Supplement 1B,C). We conclude that HH-responsive GBRs cluster with other  
128 HH-responsive regulatory regions, and are strongly associated with HH target genes,  
129 supporting their role in driving gene expression in response to HH signaling during limb  
130 development.

131  
132 **HH-responsive GBRs are distal enhancers containing high quality GLI motifs**

133 Although Stable GBRs are not highly enriched at HH target genes, 62% of them are  
134 located in close proximity to the promoters of genes, compared to 26% of HH-  
135 responsive GBRs (Fig. 1H). Most promoter-associated Stable GBRs (90%) are found at  
136 promoters with CpG islands, a quality typically associated with housekeeping genes and  
137 genes that tend to be more broadly expressed and less tissue-specific (Zhu et al. 2008).  
138 To examine how different classes of GBRs might be differentially regulated, we

139 examined their GLI binding motifs. A higher percentage of HH-dependent and HH-  
140 sensitive GBRs contain GLI motifs compared to Stable GBRs. HH-dependent and HH-  
141 sensitive GBRs also contain a higher density and higher quality of GLI motifs compared  
142 to Stable GBRs (Fig. 1I). Interestingly, we did not uncover high levels of enrichment of  
143 other motifs using de novo motif analysis (Figure 1-Source Data 3). Taken together, we  
144 find that HH-responsive GBRs are distal elements containing a higher quality and  
145 density of GLI motifs compared to stable GBRs.

146

### 147 **The Polycomb Repressor Complex does not regulate most GLI enhancers**

148 GLI activators recruit demethylases that remove H3K27me3, a hallmark of the  
149 Polycomb repressor complex (PRC2) to promote transcriptional activation of HH target  
150 genes, most notably *Gli1* and *Ptch1* (Margueron and Reinberg 2011; Shi et al. 2014;  
151 Lorberbaum et al. 2016). If PRC2 is recruited by GLI repressors, there should be  
152 enrichment of H3K27me3 at HH-responsive enhancers in *Shh*<sup>-/-</sup>, where maximal levels  
153 of GLI repression would lead to recruitment of PRC2 and thus methylation at these  
154 enhancers. Contrary to this prediction, we identified a minimal number of HH-responsive  
155 GBRs enriched for H3K27me3 in E10.5 *Shh*<sup>-/-</sup> limb buds (31/349 GBRs; Fig. 2A-C,  
156 Figure 2-Source Data 1). As reported for MEFs (Shi et al. 2014), these methylated  
157 GBRs include the pathway target *Gli1* in addition to other pathway target genes such as  
158 *Ptch1* and *Ptch2* (Fig. 2B). In contrast, most HH-responsive GBRs and target gene  
159 promoters lack enrichment of H3K27me3 in the absence of HH signaling (Fig. 2C;  
160 Figure 2-Figure Supplement 1; Figure 2-Source Data 2). We conclude that while the  
161 PRC2 complex may play a role in the regulation of a small number of HH pathway



162 target genes, it is not the primary mechanism by which GLI repressors inhibit  
163 developmental gene expression.

164

### 165 **Hedgehog signaling does not regulate other histone modifications at enhancers**

166 We considered two possible mechanisms by which GLI repression could regulate  
167 H3K27ac enrichment in response to HH signaling: first, GLI repression could cause  
168 large-scale modifications to chromatin at enhancers resulting in an overall loss of their  
169 identity as enhancers. Alternatively, GLI repressors could regulate H3K27ac specifically.  
170 To address the first mechanism, we asked if HH regulates H3K4me2, another histone  
171 modification enriched at active or poised enhancers (Pekowska et al. 2011; Wang et al.  
172 2014). H3K4me2 enriched at most GBRs in close proximity to promoters, being  
173 enriched at 26% of HH-responsive GBRs and 73% of Stable GBRs, none of which had  
174 significant reductions in H3K4me2 in *Shh*<sup>-/-</sup> limbs compared to WT controls (Fig. 2D,E).  
175 Furthermore, essentially all peaks remained unchanged between the two genotypes,  
176 where only 12 peaks were reduced in *Shh*<sup>-/-</sup> limbs, none overlapping with GLI binding  
177 regions or non-GBR HH-responsive peaks (Figure 2-Source Data 3).

178

179 As H3K4me2 marked most Stable GBRs, but only a subset of HH-responsive GBRs, we  
180 also asked if H3K4me1, another modification associated with active and poised  
181 enhancers, was altered at HH-responsive GBRs in response to HH signaling  
182 (Heintzman et al. 2007; Heintzman et al. 2009; Creighton et al. 2010; Rada-Iglesias et  
183 al. 2011). We performed CHIP on WT and *Shh*<sup>-/-</sup> limb buds and assessed enrichment of  
184 H3K4me1 at several HH-responsive GBRs by quantitative PCR, selecting intergenic

185 regions that would not overlap with promoters. All tested regions retained H3K4me1  
186 enrichment in *Shh*<sup>-/-</sup> limb buds (Fig. 2F). We conclude that HH-responsive regions retain  
187 enrichment of other active or poised enhancer marks, suggesting that HH signaling and  
188 GLI repression specifically regulate H3K27ac.

189

### 190 **Chromatin at HH-responsive GBRs compacts in the absence of Hedgehog**

191 The dynamic acetylation of HH-responsive GBRs, yet unaltered methylation of H3K4 in  
192 in *Shh*<sup>-/-</sup> limb buds are properties consistent with ‘poised’ enhancers, which retain  
193 H3K4me1 and accessible chromatin in the absence of H3K27ac (Heintzman et al. 2009;  
194 Creighton et al. 2010; Rada-Iglesias et al. 2011). Therefore, if HH-responsive  
195 enhancers are not active but ‘poised’ in the absence of HH, we predicted that chromatin  
196 accessibility would be unchanged in response to HH signaling. Using ATAC-seq to  
197 measure regions of open chromatin, we compared the accessibility of GBRs between  
198 WT and *Shh*<sup>-/-</sup> posterior limb buds, a fraction providing a more homogenous WT  
199 population of cells exposed to HH signaling (Fig. 3A; Figure 3-Source Data 1)  
200 (Buenrostro et al. 2013; Buenrostro et al. 2015). Overall, a higher percentage of Stable  
201 GBRs are accessible in WT limb buds than HH-responsive GBRs, suggesting a more  
202 restricted accessibility of HH-responsive GBRs even in WT conditions (Fig. 3B-C).  
203 Contrary to expectations for a poised enhancer, both HH-sensitive and HH-dependent  
204 GBRs have significantly reduced accessibility compared to Stable GBRs in the absence  
205 of HH signaling, with the majority of HH-responsive GBRs being more compact in *Shh*<sup>-/-</sup>  
206 compared to wild-type limbs (Fig. 3D-F). Overall, we conclude that HH-responsive  
207 GBRs are less accessible than Stable GBRs, with access being further restricted in

208 *Shh*<sup>-/-</sup> limb buds, which have constitutive GLI repression.

209

## 210 **De-repression is the dominant mechanism regulating GLI enhancer activation**

211 The presence of multiple GLI proteins and their bifunctional roles as both transcriptional

212 activators and repressors has made it challenging to determine how HH genes are

213 primarily regulated. To test this on enhancers, we performed H3K27ac ChIP in

214 *Shh*<sup>-/-</sup>;*Gli3*<sup>-/-</sup> limb buds (devoid of GLI activators and most GLI repressors). We

215 hypothesized that loss of H3K27ac at most HH-responsive enhancers is due to

216 constitutive GLI repression preventing acetylation of GLI enhancers. Thus, in

217 *Shh*<sup>-/-</sup>;*Gli3*<sup>-/-</sup> limbs, we predicted H3K27ac should be maintained at HH-responsive

218 enhancers. Alternatively, if GLI activator is required, H3K27ac would remain absent or

219 reduced as it does in *Shh*<sup>-/-</sup> limbs.

220

221 Since *Shh*<sup>-/-</sup>;*Gli3*<sup>-/-</sup> mutants are phenotypically identical to *Gli3*<sup>-/-</sup> mutants and require

222 genotyping and our ChIP protocol works best with fresh tissue, individual pairs of E10.5

223 limb buds (~100k cells/pair) were processed independently to confirm genotypes. To

224 overcome the reduced tissue available for ChIP samples, we optimized a 'MicroChIP'

225 approach to allow ChIP-seq on single pairs of limb buds and assessed H3K27ac

226 enrichment at GLI enhancers in *Shh*<sup>-/-</sup>;*Gli3*<sup>-/-</sup> limb buds (Fig. 4A; Figure 4-Source Data

227 1). As anticipated, we did have reduced signal, however we were still able to detect

228 60% of our HH-responsive GBRs and 91% of Stable GBRs. Consistent with

229 expectations, HH-responsive GBRs associated with *Gli1* and *Ptch1*, which require GLI

230 activation (Litingtung et al. 2002; te Welscher et al. 2002), had greatly reduced

231 expression in the double mutants (Fig. 4B,D). A small number of additional GBRs were  
232 also reduced in double mutants, suggesting they too require GLI activation (Fig. 4D,E).  
233 However, consistent with a GLI repression-driven model, most HH-responsive GBRs  
234 retained or increased H3K27ac enrichment in the absence of both GLI activator and  
235 repressor (Fig. 4C-E). Despite being unchanged in *Shh*<sup>-/-</sup> limbs, Stable GBRs had slight  
236 but significant increases in H3K27ac enrichment (Fig. 4F), indicating that on a  
237 population level, some of these regions respond to GLI repression (see Discussion).

238  
239 In a parallel series of experiments, we noted that HH-responsive GBRs have higher  
240 levels of H3K27ac enrichment in posterior limb halves compared to anterior limb halves  
241 (Fig. 4G). This contrasts with *Gli3*<sup>-/-</sup> limb buds, where H3K27ac levels in anterior halves  
242 are comparable to those in posterior halves (Fig. 4H), a finding that is also consistent  
243 with a GLI repressor driven model. Together these results strongly support a GLI  
244 repressor centric mode of regulation where GLI de-repression is responsible for  
245 activation of most GLI limb enhancers. We conclude that GLI activator does not mediate  
246 acetylation levels at most HH-responsive GBRs.

247

#### 248 **HDAC1 is responsible for loss of H3K27ac at HH-responsive enhancers**

249 The above results support a model in which loss of an HDAC-GLI repressor complex  
250 leads to acetylation. To test this, we cultured limb buds in the presence of the HDAC1/2  
251 inhibitor FK228 (Furumai et al. 2002), yielding greatly upregulated levels of H3K27ac  
252 within two hours of treatment (Figure 4-Figure Supplement 1). We then dissected the  
253 anterior halves of limb buds cultured in control or FK228-containing media and

254 compared the levels of H3K27ac enrichment at HH-responsive GBRs shown to have  
255 enriched H3K27ac levels in posterior limb halves. Inhibition of HDACs resulted in  
256 increased acetylation at HH-responsive enhancers compared to untreated control  
257 anterior limb buds (Fig. 4I). We conclude that GLI repressors regulate H3K27ac levels  
258 at HH-responsive GBRs at least in part through HDAC1/2.

259

### 260 **HH-responsive GBRs have increased tissue-specificity compared to Stable GBRs**

261 Having identified distinct classes of GBRs that respond differently to HH signaling, we  
262 next addressed the biological significance of this enhancer behavior. To this end, we  
263 used the VISTA enhancer database to identify a total of 305 Stable and 23 HH-  
264 responsive GBRs that had been tested for enhancer activity (Visel et al. 2007). While  
265 nearly half of each class have enhancer activity in the limb, HH-responsive GBRs tend  
266 to have activity specific to the HH-responsive posterior limb bud while Stable GBRs tend  
267 to have activity throughout the limb or regions that are not responsive to HH (Fig. 5A,B)  
268 (Ahn and Joyner 2004; Probst et al. 2011; Lewandowski et al. 2015). Furthermore, HH-  
269 responsive enhancers are active more specifically within the limb (an average of 1.9  
270 tissues) while Stable GBRs drive expression in more tissues (an average of 2.9 tissues;  
271  $P < 0.01$ ; Fig. 5C; Figure 5-Source Data 1). These results point to a role for Stable GBRs  
272 as general enhancers that drive expression in multiple tissues, while HH-responsive  
273 GBRs mediate tissue-specific expression.

274

275 To examine this more systematically, we treated HH-responsive NIH3T3 cells with and  
276 without the HH agonist purmorphamine, identified H3K27ac enriched regions by ChIP-

277 Seq, and assessed the H3K27 acetylation status of different classes of limb GBRs.  
278 Strikingly, only 12% of HH-responsive limb GBRs are also HH-responsive in NIH3T3  
279 cells. An additional 18% of HH-responsive limb enhancers have stable acetylation in  
280 NIH3T3 cells, while most lack any activity. In contrast, 70% of Stable GBRs in the limb  
281 are still active in NIH3T3 cells (Fig. 5D,E; Figure 5-Source Data 2). We conclude HH-  
282 responsive GBRs are tissue specific enhancers that mediate HH signaling while Stable  
283 GBRs have broadly expressed enhancer activity.

284

## 285 **DISCUSSION**

286 We find that a subset of GLI-bound enhancers has chromatin modifications that change  
287 in response to HH signaling. Compared to WT embryos, these regions have reduced or  
288 absent levels of histone H3K27 acetylation in *Shh*<sup>-/-</sup> embryos, suggesting a loss of  
289 enhancer activity. Many previously validated GLI limb enhancers are HH-responsive,  
290 including those regulating *Grem1*, *Ptch1* and *Gli1* (Fig. 1G) (Vokes et al. 2008; Zuniga  
291 et al. 2012; Li et al. 2014; Lopez-Rios et al. 2014). Moreover, HH-responsive GBRs are  
292 highly enriched near HH target genes while the much larger class of Stable GBRs are  
293 not (Fig. 1E). This suggests that HH target gene regulation is primarily mediated  
294 through HH-responsive GBRs. The discovery of this response provides important  
295 information about the mechanism of GLI repression. It also provides a predictive tool for  
296 identifying enhancers regulating HH target genes in other biological contexts.

297

298 We propose a model in which GLI repression primarily regulates enhancer activity by  
299 deacetylation of histone H3K27. Because H3K4me1 and H3K4me2 levels are

300 unchanged during maximal GLI repression, these enhancers presumably remain poised  
301 for activation, albeit in a less accessible state. Upon binding HH-responsive enhancers,  
302 GLI repressors recruit HDACs, which prevent otherwise competent enhancers from  
303 acquiring enriched H3K27 acetylation. The loss of GLI repression, either genetically  
304 (*Shh*<sup>-/-</sup>; *Gli3*<sup>-/-</sup> or *Gli3*<sup>-/-</sup> limb buds), or developmentally (initiation of *Shh* expression)  
305 results in a loss of GLI repression and accompanying HDAC activity (Fig. 6A). This  
306 chromatin-based mode of regulation enables the dynamic control of a field of cells  
307 containing primed enhancers. To determine if this priming event occurs on an *ad hoc*  
308 basis by disparate inputs or if it is the result of coordinated, HH-independent signaling  
309 events, we examined HH-responsive GBRs for the enrichment of additional binding  
310 motifs. Besides the GLI motif itself, no other motifs are enriched at high levels (Figure 1-  
311 Source Data 3) suggesting that HH-responsive GBRs are a heterogeneous population of  
312 enhancers with no predominant co-regulators.

313

314 Despite being critical for the transcriptional regulation of HH targets, HH-responsive  
315 enhancers are a distinct minority, constituting 6% of all GLI-bound, active enhancers.  
316 The rest are Stable GBRs with an unclear role in HH transcriptional regulation. Although  
317 these enhancers do not have significantly reduced levels of H3K27 enrichment in *Shh*<sup>-/-</sup>  
318 limbs, some of them show a trend toward reduced H3K27ac that suggests a continuum  
319 of GLI-bound enhancers that range from completely HH-responsive (HH-dependent) to  
320 those Stable GBRs that have no HH response. Consistent with this, Stable GBRs do  
321 have a modest overall increase in H3K27ac enrichment in *Shh*<sup>-/-</sup>; *Gli3*<sup>-/-</sup> limbs on a  
322 population level, indicating that their H3K27ac levels are regulated by GLI repressor to

323 some extent. On the other hand, these enhancers are enriched at CpG rich promoters,  
324 which are associated with more broadly expressed genes and are not enriched near HH  
325 target genes (Fig. 1G,H). They are also more highly conserved than HH-responsive  
326 GBRs (Figure 1-Figure Supplement 1D). In contrast to HH-responsive enhancers, they  
327 appear to be active in other cell types and tissues besides the limb (Fig. 6B). One  
328 possibility is that many Stable GBRs do not have a major role in mediating Hedgehog  
329 signaling; GLI repressors at these regions are relatively inert. A second possibility is that  
330 GLI repression at Stable GBRs mediates subtle changes to acetylation that confer small  
331 reductions in transcription that are beyond the limits of our detection. Finally, it is  
332 possible Stable enhancers are globally active, but engage in long-range collaborations  
333 with tissue specific HH-responsive enhancers to activate transcription (Fig. 6C).

334

335 Previous modeling has suggested that GLI repressors within an enhancer work  
336 cooperatively through multiple GLI sites (Parker et al. 2011), providing another  
337 mechanism for tuning enhancer response. HH responsive GBRs contain more GLI  
338 motifs than Stable GBRs, which may make them more responsive to GLI repression,  
339 although in contrast to those models, they have high quality GLI motifs. As many GLI  
340 target genes, including *Ptch1* and *Grem1*, are regulated by multiple GLI enhancers  
341 (Vokes et al. 2008; Zuniga et al. 2012; Li et al. 2014; Lopez-Rios et al. 2014;  
342 Lorberbaum et al. 2016), this integration likely extends to higher level hubs of enhancer  
343 organization. For example, HH-responsive H3K27ac regions that are not bound by GLI  
344 cluster near HH-responsive GBRs, as do Stable GBRs suggesting that they may be  
345 modified based on proximity to GLI-repressor-HDAC complexes (Figure 1-Figure



346 Supplement 1B).

347

348 The majority of HH-responsive GBRs do not have H3K27me3 enrichment even when  
349 there is maximal GLI repression (Fig. 2A-D). This indicates that the Polycomb repressor  
350 complex is not involved in mediating most GLI repression, a conclusion that seemingly  
351 conflicts with several studies showing direct or indirect roles for PRC2 in repressing HH  
352 transcription. However, these studies largely considered the transcriptional activator  
353 targets *Ptch1* or *Gli1* or looked at genetic interactions (Wyngaarden et al. 2011; Shi et  
354 al. 2014; Lorberbaum et al. 2016; Shi et al. 2016; Deimling et al. 2018). Consistent with  
355 their findings, *Gli1* has high levels of H3K27me3 enrichment in *Shh*<sup>-/-</sup> limb buds (Fig.  
356 2B). Although *Gli1* and *Ptch1* are often examined in the context of GLI de-repression,  
357 they are both GLI-activator genes in that they require the loss of GLI repression as well  
358 as subsequent GLI activation for their expression (Litingtung et al. 2002; te Welscher et  
359 al. 2002). GLI activator targets such as these are likely to differ fundamentally in their  
360 mode of regulation from those that are activated upon de-repression. As H3K27me3  
361 enrichment is commonly found at promoters (Young et al. 2011), GLI repressors on  
362 distal enhancers not directly enriched by H3K27me3 might still facilitate the recruitment  
363 of PRC2 to promoters through enhancer-promoter interactions. However, only one third  
364 of Hedgehog target genes have H3K27me3 enrichment at their promoters (Figure 2-  
365 Figure Supplement 1; Figure 2-Source Data 2), arguing against this scenario.

366 Interestingly, HH-responsive GBRs enriched for H3K27me3 in *Shh*<sup>-/-</sup> limbs have  
367 increased H3K27ac enrichment in *Shh*<sup>-/-</sup>;*Gli3*<sup>-/-</sup> limbs at all of these GBRs except for  
368 ones near the HH pathway genes *Gli1*, *Ptch1* and *Ptch2* (Fig. 4B). Thus, for rare GBRs

369 requiring GLI activation, their mode of action is consistent with previously proposed  
370 models in which GLI activators recruit a complex to remove H3K27Me3, resulting in the  
371 activation of these enhancers and subsequently their cognate target genes (Shi et al.  
372 2014).

373

374 Confusingly, HDACs have been shown to have properties both consistent with and  
375 contradictory to our model. HDACs bind to and deacetylate GLI1 and GLI2 proteins,  
376 promoting their ability to act as transcriptional activators (Canettieri et al. 2010; Coni et  
377 al. 2013; Mirza et al. 2019). HDACs have also been shown to bind cis-regulatory  
378 regions in *Gli1*, consistent with an additional role in positively regulating HH-mediated  
379 transcription (Zhan et al. 2011). On the other hand, a SKI-HDAC complex has been  
380 shown to bind to and interact genetically with GLI3 to repress anterior digit formation in  
381 the limb bud (Dai et al. 2002). Similarly, Atrophin acts as a GLI co-repressor by  
382 recruiting an HDAC complex (Zhang et al. 2013). Multiple studies with SWI/SNF BAF  
383 complex members also indicate that they regulate aspects of both GLI activation and  
384 repression, roles that have in some cases been shown to be directed by the dynamic  
385 association of BAF members with HDAC complexes (Jagani et al. 2010; Zhan et al.  
386 2011; Jeon and Seong 2016). Collectively, these studies highlight the complexity of GLI  
387 regulation and the need for further studies to determine which complexes directly impact  
388 GLI repression.

389

390

391

## 392 MATERIALS AND METHODS

### 393 Embryonic manipulations

394  
395 Experiments involving mice were approved by the Institutional Animal Care and Use  
396 Committee at the University of Texas at Austin (protocol AUP-2016-00255). The *Gli3*<sup>Xt-J</sup>  
397 and *Shh*<sup>tm1amc</sup> null alleles have been described previously (Hui and Joyner 1993;  
398 Dassule et al. 2000) and were maintained on a Swiss Webster background. The  
399 *Gli3*<sup>3XFLAG</sup> allele, with an N-terminal 3XFLAG-epitope, (Lopez-Rios et al. 2014;  
400 Lorberbaum et al. 2016) was maintained on a mixed background. For ChIP and ChIP-  
401 seq experiments, fresh E10.5 (32-35 somite) forelimb buds were pooled from multiple  
402 litters to obtain sufficient *Gli3*<sup>-/-</sup> and *Shh*<sup>-/-</sup> mutant embryos along with somite matched  
403 controls (Swiss Webster embryos for *Gli3*<sup>-/-</sup> experiments and a mixture of WT and  
404 heterozygous littermates for *Shh*<sup>-/-</sup>) embryos. For ATAC-seq, fresh pairs E10.5 (35  
405 somite) posterior forelimb buds were dissected from individual embryos.

406  
407 To inhibit HDAC1/2, E10.5 embryos (32-35S) were dissected in warm limb bud culture  
408 media (Panman et al. 2006) and explants still attached to the body wall were cultured in  
409 250nM of HDAC inhibitor FK228 (Selleckchem S3020), or DMSO vehicle control, for  
410 two hours at 37C. For each condition, 20-25 embryos were used (n=4). After incubation,  
411 the explants were changed into fresh media (without inhibitor) to dissect anterior limb  
412 buds. Cells from anterior limbs were then dissociated and processed for ChIP.

413

### 414 Cell Culture

415 NIH3T3 cells were seeded on 6 cm plates with 5x10<sup>5</sup> cells and grown for three days

416 until completely confluent. They were then switched to low serum (0.5%) and treated  
417 with 400nM purmorphamine (Stemgent 04-0009) or 0.01% DMSO (vehicle control) for 2  
418 days.

## 419 **Western Blots**

420 Whole limb buds from a single litter were lysed for 1 hour at 4C. For fractionation,  
421 500,000 cells from limb buds were then dissociated with 100ug/mL Liberase (Roche  
422 05401119001), resuspended in CSKT buffer (10mM PIPES pH6.8, 100mM NaCl,  
423 300mM sucrose, 3mM MgCl<sub>2</sub>, 1mM EDTA, 1mM DTT, 0.5% TritonX-100, incubated on  
424 ice for 10 min, and centrifuged for 5 min @ 5000g. The cytoplasmic fraction  
425 (supernatant) and nuclear pellet were each resuspended in loading dye and boiled.  
426 Western blots were incubated with the following primary antibodies for 1 hour at room  
427 temperature in 3% milk: 1:4000 M2 Flag (Sigma 3165), 1:4000 H3 (Cell Signaling 4499),  
428 1:1000 GAPDH (Cell Signaling 5174), 1:1000 H3K27ac (Abcam Ab4729), 1:2000 B-  
429 actin (Cell Signaling 8457). Secondary antibodies were incubated for 1 hours at room  
430 temperature in 3% milk: 1:5000 Donkey anti-mouse (Jackson 715-035-150), Donkey  
431 anti-rabbit (Jackson 711-005-0152).

## 432 **Chromatin Immunoprecipitation**

433 ChIP experiments were performed as previously described (Vokes et al. 2008) with the  
434 following modifications. Histones ChIPs were performed on whole E10.5 (32S-35S)  
435 forelimbs pooled from 6-8 embryos. The GLI3-FLAG ChIP and the H3K27ac ChIP on  
436 cultured and treated limbs were performed on E10.5 (32-35S) forelimbs from 20-25  
437 pooled embryos. Cells were dissociated with 100ug/ml Liberase (Roche 05401119001)  
438 and fixed for 15 minutes at room temperature in 1% formaldehyde. After cell lysis,

439 chromatin was sheared in buffer containing 0.25% SDS with a Covaris S2 focused  
440 ultrasonicator using the following settings: Duty Cycle: 2%, Intensity: 3, Cycles/burst:  
441 200, Cycle time: 60 sec, Power mode: frequency sweeping. Sheared chromatin was  
442 then split into 3 ChIP reactions and incubated with antibody-dynabead preparations  
443 overnight. The H3K27ac antibodies for conventional ChIP were from Diagenode  
444 (C15200184) and Abcam (ab4729), while the H3K27Ac antibody for MicroChIPs was  
445 from Diagenode (C15410196). Additional antibodies recognized H3K4me1 (Millipore  
446 ABE1353) H3K4me2 (Millipore 07-030) and H3K27me3 (Abcam (ab7028)). Beads were  
447 washed 5 times with RIPA buffer (1% NP40, 0.7% Sodium Deoxycholate, 1mM EDTA  
448 pH8, 50mM Hepes-KOH pH7.5, 2% w/v Lithium Chloride) and 1 time with 100mM Tris,  
449 8.0, 10mM EDTA, 8.0, 50mM NaCl and then eluted at 70°C for 15 minutes. Crosslinking  
450 was reversed overnight at 70°C. Chromatin was purified and concentrated, then  
451 subjected to quantitative PCR and/or library preparation and sequencing. Quantitative  
452 PCR-based analysis was performed using SensiFAST SYBR-LoROX (Bioline BIO-  
453 94020) on a Vii7 system (Applied Biosystems). ChIP regions subsequently tested by  
454 qPCR are referred to in the figures by the unique peak ID number (Figure 1-Source  
455 Data 2). For each biological replicate, 2-3 technical replicates were performed for each  
456 qPCR reaction and the Ct values were averaged. Chromatin enrichment was  
457 determined by calculating delta delta Ct method (Livak and Schmittgen 2001) against a  
458 control region (C1).

459

460

461

462 Primers are described below. Primers are identified by their H3K27ac Peak ID. Primers  
463 labeled #1-5 are HH-dependent GBRs.

464

465 **45402 F** (B-actin normalizing primer): AGAAGGACTCCTATGTGGGTG

466 **45402 R** (B-actin normalizing primer): ACTGACCTGGGTCATCTTTTCA

467 **45402 F** (B-actin normalizing primer for H3K4me2): AGCTAACAGCCTGCCCTCTG

468 **45402 R** (B-actin normalizing primer for H3K4me2): TTTTCCGGTGGTACCCTAC

469 **NONE F** (Negative normalizing primer): GCCAGAATTCCATCCCCTACTA

470 **NONE R** (Negative normalizing primer): CCAATAACCTGCCCTGACAT

471 **32467 F** (#1): ACGCAGGCAGTTCCAATACA

472 **32467 R** (#1): AGGGACTTCACCCAGTTCCA

473 **15198 F** (#2): CCCTCCATTCTCCCTCCTTA

474 **15198 R** (#2): GGACCTTTCCGTTGAAGTGA

475 **2666 F** (#3): CTGGCTCCCAGAATCTCTCA

476 **2666 F** (#3): TTGTGCCCCATCTCTTTCAG

477 **45094 F** (#4): GGGAGGGGTGAACTTGTCTT

478 **45094 R** (#4): TGCAAATGAACACACGCATA

479 **20941 F** (#5): TTCCCAGCTCAAGGTCATGT

480 **20941 R** (#5): AGGAGGCAATGAAGACACTGG

481

482 Samples were processed for 'MicroChIP' using the Diagenode True MicroChIP kit (Cat

483 #C01010130) with the following modifications. Briefly, individual limb pairs (~100k cells)

484 of wildtype, *Shh*<sup>-/-</sup> and *Shh*<sup>-/-</sup>;*Gli3*<sup>-/-</sup> E10.5 embryos (33-34S) were processed separately

485 by dissociating limb buds with 100ug/mL Liberase (Roche 05401119001), crosslinked  
486 for 10 minutes, lysed and then sheared. Samples were sheared on a Diagenode  
487 BioRuptor for 6 cycles on high, 30sec on/off and processed through shearing while  
488 genotyping in parallel for *Shh*<sup>-/-</sup>;*Gli3*<sup>-/-</sup> and wildtype littermates (*Shh*<sup>+/+</sup>;*Gli3*<sup>+/+</sup>). Sheared  
489 chromatin was then incubated with H3K27ac antibody (Diagenode C15410196)  
490 overnight and Protein A magnetic beads (Diagenode C03010020) the following day for  
491 2 hours. Chromatin-bound beads were washed, eluted and de-crosslinked and purified  
492 using MicroChIP DiaPure columns (Diagenode C03040001).

493

#### 494 **ChIP-Seq**

495 The ChIP-seq raw datasets from this study have been deposited in GEO (GSE108880)  
496 (see Source Data for Figures 1-5 for processed ChIP-seq and ATAC-seq data). All  
497 chromosomal coordinates refer to the mm10 version of the mouse genome.  
498 After ChIP was performed as described above, libraries were generated using the  
499 NEBNext Ultra II library preparation kit with 15 cycles of PCR amplification (NEB  
500 E7645). The libraries for the 'MicroChIP' samples were generated using the MicroPlex  
501 library prep kit (Diagenode C05010012) and sequenced to a depth of >40 million reads  
502 per sample for both ChIP and 'MicroChIP' experiments, using two biological replicates.  
503 Peaks were called using CisGenome version 2.1.0 (Ji et al. 2008). To identify  
504 differentially enriched peaks in the WT and *Shh*<sup>-/-</sup> limb buds (or control and  
505 purmorphamine-treated NIH3T3 cells), the peaks were merged to determine how many  
506 WT, WT input, *Shh*<sup>-/-</sup> and *Shh*<sup>-/-</sup> input reads overlapped with the peak region. The read  
507 numbers were adjusted by library size and log<sub>2</sub> transformed after adding a pseudo-

508 count of 1. The differential analysis between WT and WT input used limma (Ritchie et  
509 al. 2015). The FDR of the differential test was obtained and peaks with FDR < 0.05 are  
510 determined as having differential signal between WT and WT input. The same  
511 differential analysis procedure was repeated to compare between *Shh*<sup>-/-</sup> and *Shh*<sup>-/-</sup>  
512 input, and between WT and *Shh*<sup>-/-</sup>. To determine GLI motif quality, de novo motif  
513 discovery was performed on the 1000 GBRs with the highest quality using the  
514 flexmodule\_motif function in CisGenome to identify the GLI motif. The GLI motif was  
515 mapped to the mouse genome using the motifmap\_matrixscan\_genome function in  
516 CisGenome software with default parameters.

517

#### 518 **ATAC-Seq**

519 Individual pairs of posterior forelimb fractions were dissected from 35 somite wildtype  
520 (n=2) or *Shh*<sup>-/-</sup> embryos (n=2). ATAC used components from the Nextera DNA Library  
521 Preparation Kit (Illumina) as described previously (Buenrostro et al. 2015) with the  
522 following variations. 5,000 cells from each sample were added into each reaction and  
523 cells were lysed on ice for 8 min. prior to centrifugation. Libraries were generated using  
524 18 cycles of PCR amplification with NEB high fidelity 2x master mix (New England  
525 Biolabs), cleaned up with AMPure XP beads (Beckman Coulter) and sequenced on an  
526 Illumina NextSeq 500 using PEX75 to a depth of 30 million reads. Peaks were called  
527 using MACS2 with a fixed window size of 200bp and a q-value cutoff of 0.05. Differential  
528 analysis of wildtype versus *Shh*<sup>-/-</sup> peak signals was performed essentially as described  
529 for ChIP above using limma (Ritchie et al. 2015).

530



531 **ACKNOWLEDGMENTS**

532 We thank Blerta Xhemalce, Samantha Brugmann, Kevin Peterson and Janani  
533 Ramachandran for comments on the manuscript. We thank Drs. Ken Zaret, Maki  
534 Iwafuchi-Doi, Jongwhan Kim and Cathy Rhee for advice on performing ATAC-seq and  
535 Jessica Podnar from the Genomic Sequencing and Analysis Facility at the University of  
536 Texas at Austin for technical advice. The Texas Advanced Computing Center (TACC) at  
537 The University of Texas at Austin provided computational resources. This work was  
538 supported by NIH R01HD073151 (to SAV and HJ), The St. Baldrick's Foundation (to  
539 SAV) and F31DE027597 (to RKL).

540

541 **AUTHOR CONTRIBUTIONS**

542 SV, RL, KF, ZJ and HJ conceived experiments; RL, ZJ, KF, JH and WZ performed  
543 experiments; SV, RL and KF wrote the initial draft; all authors participated in editing.

## REFERENCES

- 544 Ahn S, Joyner AL. 2004. Dynamic changes in the response of cells to positive  
545 hedgehog signaling during mouse limb patterning. *Cell* **118**: 505-516.
- 546 Bai CB, Stephen D, Joyner AL. 2004. All mouse ventral spinal cord patterning by  
547 hedgehog is Gli dependent and involves an activator function of Gli3. *Dev Cell* **6**:  
548 103-115.
- 549 Bowers M, Eng L, Lao Z, Turnbull RK, Bao X, Riedel E, Mackem S, Joyner AL. 2012.  
550 Limb anterior-posterior polarity integrates activator and repressor functions of  
551 GLI2 as well as GLI3. *Dev Biol* **370**: 110-124.
- 552 Buenrostro JD, Giresi PG, Zaba LC, Chang HY, Greenleaf WJ. 2013. Transposition of  
553 native chromatin for fast and sensitive epigenomic profiling of open chromatin,  
554 DNA-binding proteins and nucleosome position. *Nat Methods* **10**: 1213-1218.
- 555 Buenrostro JD, Wu B, Chang HY, Greenleaf WJ. 2015. ATAC-seq: A Method for  
556 Assaying Chromatin Accessibility Genome-Wide. *Curr Protoc Mol Biol* **109**: 21 29  
557 21-29.
- 558 Canettieri G, Di Marcotullio L, Greco A, Coni S, Antonucci L, Infante P, Pietrosanti L, De  
559 Smaele E, Ferretti E, Miele E et al. 2010. Histone deacetylase and Cullin3-  
560 REN(KCTD11) ubiquitin ligase interplay regulates Hedgehog signalling through  
561 Gli acetylation. *Nat Cell Biol* **12**: 132-142.
- 562 Chiang C, Litingtung Y, Harris MP, Simandl BK, Li Y, Beachy PA, Fallon JF. 2001.  
563 Manifestation of the limb prepattern: limb development in the absence of sonic  
564 hedgehog function. *Dev Biol* **236**: 421-435.
- 565 Coni S, Antonucci L, D'Amico D, Di Magno L, Infante P, De Smaele E, Giannini G, Di  
566 Marcotullio L, Screpanti I, Gulino A et al. 2013. Gli2 acetylation at lysine 757  
567 regulates hedgehog-dependent transcriptional output by preventing its promoter  
568 occupancy. *PLoS One* **8**: e65718.
- 569 Cotney J, Leng J, Oh S, DeMare LE, Reilly SK, Gerstein MB, Noonan JP. 2012.  
570 Chromatin state signatures associated with tissue-specific gene expression and  
571 enhancer activity in the embryonic limb. *Genome Res* **22**: 1069-1080.
- 572 Creighton MP, Cheng AW, Welstead GG, Kooistra T, Carey BW, Steine EJ, Hanna J,  
573 Lodato MA, Frampton GM, Sharp PA et al. 2010. Histone H3K27ac separates  
574 active from poised enhancers and predicts developmental state. *Proc Natl Acad  
575 Sci U S A* **107**: 21931-21936.
- 576 Dai P, Shinagawa T, Nomura T, Harada J, Kaul SC, Wadhwa R, Khan MM, Akimaru H,  
577 Sasaki H, Colmenares C et al. 2002. Ski is involved in transcriptional regulation  
578 by the repressor and full-length forms of Gli3. *Genes Dev* **16**: 2843-2848.
- 579 Dassule HR, Lewis P, Bei M, Maas R, McMahon AP. 2000. Sonic hedgehog regulates  
580 growth and morphogenesis of the tooth. *Development* **127**: 4775-4785.
- 581 Deimling SJ, Lau K, Hui CC, Hopyan S. 2018. Genetic interaction between Gli3 and  
582 Ezh2 during limb pattern formation. *Mech Dev*.
- 583 Dixon JR, Selvaraj S, Yue F, Kim A, Li Y, Shen Y, Hu M, Liu JS, Ren B. 2012.  
584 Topological domains in mammalian genomes identified by analysis of chromatin  
585 interactions. *Nature* **485**: 376-380.
- 586 Falkenstein KN, Vokes SA. 2014. Transcriptional regulation of graded Hedgehog  
587 signaling. *Semin Cell Dev Biol* **33**: 73-80.

- 588 Furumai R, Matsuyama A, Kobashi N, Lee KH, Nishiyama M, Nakajima H, Tanaka A,  
589 Komatsu Y, Nishino N, Yoshida M et al. 2002. FK228 (depsipeptide) as a natural  
590 prodrug that inhibits class I histone deacetylases. *Cancer Res* **62**: 4916-4921.
- 591 Harfe BD, Scherz PJ, Nissim S, Tian H, McMahon AP, Tabin CJ. 2004. Evidence for an  
592 expansion-based temporal Shh gradient in specifying vertebrate digit identities.  
593 *Cell* **118**: 517-528.
- 594 Heintzman ND, Hon GC, Hawkins RD, Kheradpour P, Stark A, Harp LF, Ye Z, Lee LK,  
595 Stuart RK, Ching CW et al. 2009. Histone modifications at human enhancers  
596 reflect global cell-type-specific gene expression. *Nature* **459**: 108-112.
- 597 Heintzman ND, Stuart RK, Hon G, Fu Y, Ching CW, Hawkins RD, Barrera LO, Van  
598 Calcar S, Qu C, Ching KA et al. 2007. Distinct and predictive chromatin  
599 signatures of transcriptional promoters and enhancers in the human genome. *Nat*  
600 *Genet* **39**: 311-318.
- 601 Hui CC, Joyner AL. 1993. A mouse model of greig cephalopolysyndactyly syndrome:  
602 the extra-toesJ mutation contains an intragenic deletion of the Gli3 gene. *Nat*  
603 *Genet* **3**: 241-246.
- 604 Jagani Z, Mora-Blanco EL, Sansam CG, McKenna ES, Wilson B, Chen D, Klekota J,  
605 Tamayo P, Nguyen PT, Tolstorukov M et al. 2010. Loss of the tumor suppressor  
606 Snf5 leads to aberrant activation of the Hedgehog-Gli pathway. *Nat Med* **16**:  
607 1429-1433.
- 608 Jeon S, Seong RH. 2016. Anteroposterior Limb Skeletal Patterning Requires the  
609 Bifunctional Action of SWI/SNF Chromatin Remodeling Complex in Hedgehog  
610 Pathway. *PLoS Genet* **12**: e1005915.
- 611 Ji H, Jiang H, Ma W, Johnson DS, Myers RM, Wong WH. 2008. An integrated software  
612 system for analyzing ChIP-chip and ChIP-seq data. *Nat Biotechnol* **26**: 1293-  
613 1300.
- 614 Lewandowski JP, Du F, Zhang S, Powell MB, Falkenstein KN, Ji H, Vokes SA. 2015.  
615 Spatiotemporal regulation of GLI target genes in the mammalian limb bud. *Dev*  
616 *Biol* **406**: 92-103.
- 617 Li Q, Lewandowski JP, Powell MB, Norrie JL, Cho SH, Vokes SA. 2014. A Gli silencer is  
618 required for robust repression of gremlin in the vertebrate limb bud. *Development*  
619 **141**: 1906-1914.
- 620 Litingtung Y, Dahn RD, Li Y, Fallon JF, Chiang C. 2002. Shh and Gli3 are dispensable  
621 for limb skeleton formation but regulate digit number and identity. *Nature* **418**:  
622 979-983.
- 623 Livak KJ, Schmittgen TD. 2001. Analysis of relative gene expression data using real-  
624 time quantitative PCR and the 2(-Delta Delta C(T)) Method. *Methods* **25**: 402-  
625 408.
- 626 Lopez-Rios J, Duchesne A, Speziale D, Andrey G, Peterson KA, Germann P, Unal E,  
627 Liu J, Floriot S, Barbey S et al. 2014. Attenuated sensing of SHH by Ptch1  
628 underlies evolution of bovine limbs. *Nature* **511**: 46-51.
- 629 Lorberbaum DS, Ramos AI, Peterson KA, Carpenter BS, Parker DS, De S, Hillers LE,  
630 Blake VM, Nishi Y, McFarlane MR et al. 2016. An ancient yet flexible cis-  
631 regulatory architecture allows localized Hedgehog tuning by patched/Ptch1. *Elife*  
632 **5**.

- 633 Margueron R, Reinberg D. 2011. The Polycomb complex PRC2 and its mark in life.  
634 *Nature* **469**: 343-349.
- 635 Mirza AN, McKellar SA, Urman NM, Brown AS, Hollmig T, Aasi SZ, Oro AE. 2019.  
636 LAP2 Proteins Chaperone GLI1 Movement between the Lamina and Chromatin  
637 to Regulate Transcription. *Cell* **176**: 198-212 e115.
- 638 Oosterveen T, Kurdija S, Alekseenko Z, Uhde CW, Bergsland M, Sandberg M,  
639 Andersson E, Dias JM, Muhr J, Ericson J. 2012. Mechanistic differences in the  
640 transcriptional interpretation of local and long-range Shh morphogen signaling.  
641 *Dev Cell* **23**: 1006-1019.
- 642 Panman L, Galli A, Lagarde N, Michos O, Soete G, Zuniga A, Zeller R. 2006.  
643 Differential regulation of gene expression in the digit forming area of the mouse  
644 limb bud by SHH and gremlin 1/FGF-mediated epithelial-mesenchymal  
645 signalling. *Development* **133**: 3419-3428.
- 646 Parker DS, White MA, Ramos AI, Cohen BA, Barolo S. 2011. The cis-regulatory logic of  
647 Hedgehog gradient responses: key roles for gli binding affinity, competition, and  
648 cooperativity. *Sci Signal* **4**: ra38.
- 649 Pekowska A, Benoukraf T, Zacarias-Cabeza J, Belhocine M, Koch F, Holota H, Imbert  
650 J, Andrau JC, Ferrier P, Spicuglia S. 2011. H3K4 tri-methylation provides an  
651 epigenetic signature of active enhancers. *EMBO J* **30**: 4198-4210.
- 652 Probst S, Kraemer C, Demougin P, Sheth R, Martin GR, Shiratori H, Hamada H, Iber D,  
653 Zeller R, Zuniga A. 2011. SHH propagates distal limb bud development by  
654 enhancing CYP26B1-mediated retinoic acid clearance via AER-FGF signalling.  
655 *Development* **138**: 1913-1923.
- 656 Rada-Iglesias A, Bajpai R, Swigut T, Brugmann SA, Flynn RA, Wysocka J. 2011. A  
657 unique chromatin signature uncovers early developmental enhancers in humans.  
658 *Nature* **470**: 279-283.
- 659 Ritchie ME, Phipson B, Wu D, Hu Y, Law CW, Shi W, Smyth GK. 2015. limma powers  
660 differential expression analyses for RNA-sequencing and microarray studies.  
661 *Nucleic Acids Res* **43**: e47.
- 662 Shi X, Wang Q, Gu J, Xuan Z, Wu JI. 2016. SMARCA4/Brg1 coordinates genetic and  
663 epigenetic networks underlying Shh-type medulloblastoma development.  
664 *Oncogene* **35**: 5746-5758.
- 665 Shi X, Zhang Z, Zhan X, Cao M, Satoh T, Akira S, Shpargel K, Magnuson T, Li Q, Wang  
666 R et al. 2014. An epigenetic switch induced by Shh signalling regulates gene  
667 activation during development and medulloblastoma growth. *Nat Commun* **5**:  
668 5425.
- 669 te Welscher P, Zuniga A, Kuijper S, Drenth T, Goedemans HJ, Meijlink F, Zeller R.  
670 2002. Progression of vertebrate limb development through SHH-mediated  
671 counteraction of GLI3. *Science* **298**: 827-830.
- 672 Visel A, Minovitsky S, Dubchak I, Pennacchio LA. 2007. VISTA Enhancer Browser--a  
673 database of tissue-specific human enhancers. *Nucleic Acids Res* **35**: D88-92.
- 674 Vokes SA, Ji H, Wong WH, McMahon AP. 2008. A genome-scale analysis of the cis-  
675 regulatory circuitry underlying sonic hedgehog-mediated patterning of the  
676 mammalian limb. *Genes Dev* **22**: 2651-2663.

- 677 Wang B, Fallon JF, Beachy PA. 2000. Hedgehog-regulated processing of Gli3 produces  
678 an anterior/posterior repressor gradient in the developing vertebrate limb. *Cell*  
679 **100**: 423-434.
- 680 Wang C, Pan Y, Wang B. 2010. Suppressor of fused and Spop regulate the stability,  
681 processing and function of Gli2 and Gli3 full-length activators but not their  
682 repressors. *Development* **137**: 2001-2009.
- 683 Wang Y, Li X, Hu H. 2014. H3K4me2 reliably defines transcription factor binding regions  
684 in different cells. *Genomics* **103**: 222-228.
- 685 Weiner A, Lara-Astiaso D, Krupalnik V, Gafni O, David E, Winter DR, Hanna JH, Amit I.  
686 2016. Co-ChIP enables genome-wide mapping of histone mark co-occurrence at  
687 single-molecule resolution. *Nat Biotechnol* **34**: 953-961.
- 688 Wijgerde M, McMahon JA, Rule M, McMahon AP. 2002. A direct requirement for  
689 Hedgehog signaling for normal specification of all ventral progenitor domains in  
690 the presumptive mammalian spinal cord. *Genes Dev* **16**: 2849-2864.
- 691 Wyngaarden LA, Delgado-Olguin P, Su IH, Bruneau BG, Hopyan S. 2011. Ezh2  
692 regulates anteroposterior axis specification and proximodistal axis elongation in  
693 the developing limb. *Development* **138**: 3759-3767.
- 694 Young MD, Willson TA, Wakefield MJ, Trounson E, Hilton DJ, Blewitt ME, Oshlack A,  
695 Majewski IJ. 2011. ChIP-seq analysis reveals distinct H3K27me3 profiles that  
696 correlate with transcriptional activity. *Nucleic Acids Res* **39**: 7415-7427.
- 697 Zhan X, Shi X, Zhang Z, Chen Y, Wu JI. 2011. Dual role of Brg chromatin remodeling  
698 factor in Sonic hedgehog signaling during neural development. *Proc Natl Acad*  
699 *Sci U S A* **108**: 12758-12763.
- 700 Zhang Z, Feng J, Pan C, Lv X, Wu W, Zhou Z, Liu F, Zhang L, Zhao Y. 2013. Atrophin-  
701 Rpd3 complex represses Hedgehog signaling by acting as a corepressor of CiR.  
702 *J Cell Biol* **203**: 575-583.
- 703 Zhu J, He F, Hu S, Yu J. 2008. On the nature of human housekeeping genes. *Trends*  
704 *Genet* **24**: 481-484.
- 705 Zuniga A, Laurent F, Lopez-Rios J, Klasen C, Matt N, Zeller R. 2012. Conserved cis-  
706 regulatory regions in a large genomic landscape control SHH and BMP-regulated  
707 Gremlin1 expression in mouse limb buds. *BMC Dev Biol* **12**: 23.
- 708
- 709

## 710 **FIGURE LEGENDS**

711 **Figure 1. Hedgehog signaling regulates acetylation of H3K27 at a subset of GLI**  
712 **binding regions.** A. Intersection of endogenous GLI3 and H3K27ac binding regions in  
713 WT E10.5 limb buds (n=2). B. Pipeline for identifying different categories of GLI bound  
714 regions. C. Heatmap depicting differential H3K27ac enrichment in WT over *Shh*<sup>-/-</sup> limb  
715 buds for HH-responsive and Stable GBRs. D. Classification of GBR categories from  
716 E10.5 GBRs with H3K27ac in WT limbs. E-F. H3K27ac enrichment in WT and *Shh*<sup>-/-</sup> is  
717 shown across a representative genomic region near a Stable GBR (E) and two  
718 biologically validated HH-responsive GBRs: GRE1 (Li et al. 2014) and GRS1(Zuniga et  
719 al. 2012) at the HH target gene *Gremlin 1* (*Grem1*) (F). G. HH-dependent GBRs, HH-  
720 responsive GBRs and Stable GBRs are significantly enriched near HH target genes  
721 compared to randomly chosen genes (p=0 p=0, and p=0 respectively permutation test  
722 based on 10,000 permutations). H. Distribution of Stable and HH-responsive GBRs  
723 arounds transcription start sites (TSS), indicating significant enrichment of Stable GBRs  
724 (63%) at TSS compared to HH-responsive GBRs (26%) (p=2.55e-40, Fisher exact test,  
725 two sided). I. Both HH-dependent and HH-sensitive GBRs have significantly more GLI  
726 motifs than Stable GBRs (top)(p=2.2e-16 and p=8.00e-06; one-sided proportional test).  
727 GBRs containing GLI motifs have significantly more motifs per GBR within HH-dependent  
728 GBRs than Stable GBRs (p=5.92e-06; one-sided Wilcoxon test) and the quality of GLI  
729 motifs is significantly higher for HH-dependent and HH-sensitive GBRs than Stable GBRs  
730 (p= 5.03e-13 and p=5.98e-08; one-sided Wilcoxon test). See Figure1-Figure Supplement  
731 1, Figure 1-Source Data 1, Figure 1-Source Data 2, Figure1-Source Data 3.

732

733 **Figure 2. Most HH-responsive GBRs are not regulated by Polycomb repression**  
734 **and retain markers of poised enhancers.** A. Chart depicts HH-responsive GBRs that  
735 contain enrichment for the PRC2 marker H3K27me3 in *Shh*<sup>-/-</sup> limb buds (n=2). B. Tracks  
736 depicting a HH-responsive region in *Gli1* with differential H3K27ac enrichment in WT  
737 and *Shh*<sup>-/-</sup> limb buds and H3K27me3 enrichment in *Shh*<sup>-/-</sup> limb buds. C. Tracks depicting  
738 a representative HH-dependent GBR that also lacks H3K27me3. D. Scatter plot for  
739 H3K4me2 enrichment of Stable and HH-responsive GBRs from WT and *Shh*<sup>-/-</sup> limb buds  
740 (n=2). No GBRs show significant changes in di-methylation of H3K4 between WT and  
741 *Shh*<sup>-/-</sup>. E. Representative track showing comparable levels of H3K4me2 enrichment for a  
742 HH-responsive GBR in WT and *Shh*<sup>-/-</sup> limb buds. G. Quantitative-PCR assays indicating  
743 H3K4me1 ChIP enrichment in WT and *Shh*<sup>-/-</sup> limb buds at HH-dependent GBRs (n=2).  
744 See Figure2-Figure Supplement 1, Figure2-Source Data1, Figure2-Source Data2,  
745 Figure 2-Source Data 3.

746  
747 **Figure 3. Chromatin accessibility is reduced in the absence of Hedgehog**  
748 **signaling.** A. ATAC-seq pipeline for single pairs of dissected posterior halves of  
749 forelimbs (n=2). ATAC peaks, signifying accessible chromatin regions were intersected  
750 with Stable GBRs and HH-responsive GBRs. B. Many HH-responsive GBRs that are  
751 accessible in WT limb buds are inaccessible *Shh*<sup>-/-</sup> limb buds, while the accessibility of  
752 Stable GBRs remain largely unchanged. C. Plot of log<sub>2</sub> fold changes in chromatin  
753 accessibility in WT limbs indicating that Stable GBRs are more accessible than HH-  
754 dependent and HH-responsive GBRs (p= 3.98e-19, p= 9.21e-11; Wilcoxon rank sum  
755 test). Each data point represents a single GBR and red bars indicate the median, upper  
756 and lower quartiles. D-E. Representative ATAC-seq peaks showing lack of accessibility

757 in *Shh*<sup>-/-</sup> limb buds at HH-responsive GBRs (D), but not in Stable GBRs (E). F. Plot of  
758 log<sub>2</sub> fold changes in chromatin accessibility in the presence and absence of HH  
759 signaling. HH-responsive GBRs are significantly less accessible than Stable GBRs  
760 (Stable vs. HH-sensitive. p=0.001; Stable vs. HH-dependent p= 4.99e-09; Wilcoxon  
761 rank sum test). See Figure3-Source Data 1.

762

763 **Figure 4. GLI de-repression activates most HH-responsive enhancers.** A. *Shh*<sup>-/-</sup>  
764 ;*Gli3*<sup>-/-</sup> H3K27ac 'MicroChIPs' on single pairs of E10.5 forelimbs (33-34S) *Shh*<sup>-/-</sup>;*Gli3*<sup>-/-</sup>  
765 and WT littermate controls (n=2, respectively). B. A HH-responsive GBR near *Gli1*  
766 which requires GLI activator for H3K27ac enrichment. C. Representative examples of  
767 HH-responsive GBRs, activated by loss of GLI repressor that do not require GLI  
768 activator. D-F. Scatter plot of H3K27ac enrichment of HH-dependent, HH-sensitive and  
769 Stable GBRs in WT and *Shh*<sup>-/-</sup>;*Gli3*<sup>-/-</sup> limbs. Each dot represents a single GBR. The p-  
770 values indicate a significant enrichment of acetylation in *Shh*<sup>-/-</sup>;*Gli3*<sup>-/-</sup> among all GBR  
771 classes (Wilcoxon-rank sum tests). G-H. E10.5 WT and *Gli3*<sup>-/-</sup> limb buds were dissected  
772 into anterior and posterior halves as indicated and selected HH-dependent GBRs were  
773 tested for H3K27ac enrichment by quantitative PCR in each fraction (n=4). HH-  
774 dependent GBRs have higher ratios of posterior to anterior H3K27ac enrichment in WT  
775 limb buds (G) while most HH-dependent GBRs have equal ratios of posterior to anterior  
776 H3K27ac enrichment in *Gli3*<sup>-/-</sup> limb buds (H) (asterisks indicate p<0.05, paired T-test). I.  
777 Inhibition of HDAC 1/2 using 250nM of FK228 in cultured limb buds for two hours  
778 resulted in significant increases of H3K27ac enrichment in anterior cultured limb buds  
779 compared to control anterior limbs (n=4; asterisks indicate p<0.05, paired T-test). See



780 Figure 4-Figure Supplement 1, Figure 4-Source Data 1.

781

782 **Figure 5. Hedgehog-responsive GBRs have tissue-specific enhancer activity**

783 **within HH-specific domains.** A. Enhancers with annotated limb activity in VISTA

784 corresponding to representative HH-responsive GBRs (bottom) and Stable GBRs (top)

785 with limbs magnified and outlined in insets. Limb buds containing HH-specific domains

786 of enhancer activity are indicated by an asterisk. B. Chart indicating total number of

787 VISTA enhancers tested for HH-responsive and Stable GBRs, the numbers of

788 enhancers for each category and their limb enhancer activity. C. Chart delineating the

789 percentage of HH-responsive and Stable limb enhancers that drive expression in one or

790 more tissues. D. Schematic of NIH3T3 H3K27ac ChIP treated with and without the HH

791 agonist purmorphamine (+HH) and the activity of representative HH-responsive and

792 Stable limb GBRs in response to HH activation in limb and NIH3T3 cells (n=2). E. Graph

793 indicating how the acetylation status of HH-responsive and Stable limb GBRs responds

794 to HH signaling in HH-responsive NIH3T3 cells. See Figure 5-Source Data1, Figure 5-

795 Source Data 2.

796

797 **Figure 6. Model for GLI transcriptional repression.** A. In the absence of HH, GLI

798 repressors bind to enhancers for HH target genes, limiting their accessibility and

799 recruiting an HDAC complex that de-acetylates Histone H3K27, inactivating the

800 enhancer. In the presence of HH signaling, GLI de-repression and loss of associated

801 HDAC activity result in increased accessibility, the accumulation of H3K27ac and gene

802 transcription. B. Schematic showing tissue-restricted activity of HH-responsive GBRs

803 within HH-responsive gene expression domains. C. Possible roles for Stable GBRs in  
804 HH transcriptional regulation.

805

## 806 **FIGURE SUPPLEMENT LEGENDS**

807 **Figure 1-Figure Supplement 1. Nuclear localization of GLI3 and properties of GLI**  
808 **binding regions.** A. Western blots from E10.5 limb buds indicating the distribution of  
809 endogenous GLI3<sup>Flag</sup> in cytoplasmic and nuclear fractions. B. Hedgehog-responsive  
810 enhancers that are not bound by GLI are clustered near GLI binding regions. Box plot  
811 indicates the proximity of HH-responsive H3K27ac peaks that are not bound by GLI to  
812 either HH-Responsive GBRs or Stable GBRs compared to random peaks. For both HH-  
813 responsive and stable GBRs, the number of HH-Responsive non-GBR H3K27ac peaks  
814 is significantly larger than the number of random regions (Wilcoxon-test p-value = 0). C.  
815 HH-responsive peaks not bound by GLI3 are clustered together. The genome was split  
816 into 100,000 base-pair non-overlapping windows and the number of HH-responsive  
817 H3K27ac peaks that are not bound by GLI3 were counted as well as the number of  
818 random peaks. Only windows that overlapped with at least one HH-responsive  
819 H3K27ac peak or random peak were considered. The two counts are significantly  
820 different (Wilcoxon-test p-value = 0). The dark black line indicates the median. The  
821 lower boundary of the box indicates the first quantile, while the upper boundary of the  
822 third box is the third quantile. The circles indicate outliers. D. Box plot showing the  
823 conservation scores for different classes of GBRs. The conservation scores correspond  
824 to phastCons values linearly scaled from 0 to 255. HH-responsive GBRs have  
825 significantly lower conservation scores than stable GBRs (p-value = 0.0001134492, one

826 sided Wilcoxon test). None of the other pairs of GBRs are significantly different from  
827 each other. 'Coding regions' represent conservation scores for all protein coding genes  
828 in the mouse mm10 genome while 'Random regions' represent conservation scores for  
829 a set of 1000 random genomic loci that do not overlap with any gene. The dark black  
830 line indicates the median. The lower boundary of the box indicates the first quartile,  
831 while the upper boundary of the third box is the third quartile. The circles indicate  
832 outliers.

833

834 **Figure 2-Figure Supplement 1. H3K27Me3 enrichment at the promoters of GLI**

835 **target genes** A. Schematic illustrating a hypothetical mechanism by which GLI

836 repressors bound to distal enhancers could facilitate the deposition of PRC2-marked

837 H3K27Me3 at the promoters of target genes. B. H3K27Me3 enrichment within the

838 promoters of 22 HH responsive genes that also have HH-dependent GBRs (Figure 2-

839 Source Data 2) was determined as for the enhancers except that the reads were

840 summed in gene promoters instead of peak regions within a window spanning from

841 1500 bp upstream to 500 bp downstream of the transcriptional start site. H3K27Me3

842 enrichment was present in the promoters of 8/22 target genes.

843

844 **Figure 4-Figure Supplement 1. H3K27ac is increased upon HDAC inhibition. A.**

845 Western blot of cultured limb buds treated with DMSO or the HDAC1/2 inhibitor, FK228

846 (250nM) for 2 hours showing increased overall levels of H3K27 acetylation. Note that

847 these are whole limb buds rather than anterior and posterior fractions shown in Figure

848 5.

849 **SOURCE DATA LEGENDS**

850 **Figure 1-Source Data 1. Endogenous GLI3-Flag ChIP-seq analyzed data and**  
851 **called peaks.** GLI3 binding regions with called peaks with a false discovery rate (FDR)  
852 <0.05 from two biological replicates of E10.5 (32-35S) forelimbs. Rank ordered  
853 coordinates, peak length, log2 fold change (log2FC) and FDR are listed for each peak.  
854

855 **Figure 1-Source Data 2. WT vs *Shh*<sup>-/-</sup> H3K27ac ChIP-seq analyzed data and called**  
856 **peaks.** H3K27ac called peaks with a FDR <0.05 from two biological replicates from WT  
857 and *Shh*<sup>-/-</sup> E10.5 forelimbs. For each peak, the assigned Peak ID, coordinates, peak  
858 type, fold change normalized to input for WT and *Shh*<sup>-/-</sup> samples and fold change of WT  
859 over *Shh*<sup>-/-</sup> are listed. Additional tabs include sorted datasets for sub-classifications.  
860 Tabs containing GBRs indicate intersections with GLI binding regions.

861 **Figure 1-Source Data 3. Motifs uncovered from HH-responsive enhancers.** Table  
862 showing the top 20 motifs uncovered from de novo motif analysis on HH-responsive  
863 GBRs. The enrichment is relative to matched genomic controls. Note that 'HH\_resp\_2'  
864 is the only motif with an enrichment value of greater than 2 and corresponds with a  
865 known GLI binding motif.

866 **Figure 2-Source Data 1. *Shh*<sup>-/-</sup> H3K27me3 ChIP-seq analyzed data and called**  
867 **peaks.** H3K27me3 called peaks with a FDR <0.05 from two replicates of *Shh*<sup>-/-</sup> E10.5  
868 forelimbs. For each peak, the assigned Peak ID, coordinates, log2 fold change  
869 normalized signal to input. Additional tab includes H3K27me3 peaks that overlap with  
870 GLI3 binding regions; the GBR sub-classifications are specified.

871 **Figure 2-Source Data 2. Hedgehog responsive genes with H3K27me3 enrichment.**

872 The first column indicates genes previously identified as differentially expressed  
873 between *Shh*<sup>-/-</sup> and WT E10.5 limb buds (Lewandowski et al. 2015). The second column  
874 indicates the fold enrichment of H3K27me3 at the promoter compared to Input with the  
875 adjusted P-value indicated in the third column. The fourth column indicates whether the  
876 gene has a HH-dependent GBR (indicated by 1 and yellow shading) within the same  
877 presumptive TAD (Dixon et al. 2012). There are 22 HH-dependent target genes out of  
878 80 HH-responsive genes.

879

880 **Figure 2-Source Data 3. WT vs *Shh*<sup>-/-</sup> H3K4me2 ChIP-seq analyzed data and called**

881 **peaks.** H3K4me2 called peaks with a FDR <0.05 from two replicates from WT and  
882 *Shh*<sup>-/-</sup> E10.5 forelimbs. For each peak, the assigned Peak ID, coordinates, peak type,  
883 fold change normalized to input for WT and *Shh*<sup>-/-</sup> samples and fold change of WT over  
884 *Shh*<sup>-/-</sup> are listed. Additional tabs include sorted files for each peak type. Under the 'GLI3  
885 binding' column, 'TRUE' implies overlap with a GBR, while 'FALSE' indicates no  
886 overlap.

887

888 **Figure 3-Source Data 1. WT vs *Shh*<sup>-/-</sup> ATAC-Seq analyzed data and called peaks.**

889 Coordinates for all ATAC peaks in the WT group that overlap with GBRs are listed.  
890 "Shh\_ATAC\_peak" identifies the corresponding id# for that peak in the *Shh*<sup>-/-</sup> data, and  
891 if a peak is not present in the *Shh*<sup>-/-</sup> samples, it is marked as NA. A column for each  
892 GBR type identifies which GBR type a given ATAC peak overlaps with. The number  
893 indicates the peak ID. If a peak region does not overlap with the type of peak in that list,

894 it will be marked as NA. The normalized log<sub>2</sub> transformed signals are showed for each  
895 sample in addition to the "average" signal across all samples. The "t" statistic calculates  
896 the difference in signals between WT and *Shh*<sup>-/-</sup> by taking into consideration fold-  
897 change and variance among samples. A positive t statistic values indicate a peak is  
898 more accessible in WT than *Shh*<sup>-/-</sup> and a negative t statistic indicates higher  
899 accessibility in *Shh*<sup>-/-</sup>. The "p.value" is obtained from a moderated t-test using limma.  
900 The "p.value.adj" is the adjusted p-value (FDR) using the Benjamini-Hochberg  
901 procedure.

902

903 **Figure 4-Source Data 1. WT vs *Shh*<sup>-/-</sup>;*Gli3*<sup>-/-</sup> H3K27ac MicroChIP-seq analyzed data**  
904 **and called peaks.** H3K27ac called peaks with a FDR <0.05 from two replicates of WT,  
905 *Shh*<sup>-/-</sup> and *Shh*<sup>-/-</sup>;*Gli3*<sup>-/-</sup> E10.5 (33-34S) forelimbs. Separate tabs for each genotype  
906 include peak coordinates and log<sub>2</sub> fold change over input. Additional tabs include a  
907 peak summary and differential analysis of WT vs. *Shh*<sup>-/-</sup>;*Gli3*<sup>-/-</sup>. Differential analysis tab  
908 lists peak coordinates, peak type, fold change normalized to input for WT and *Shh*<sup>-/-</sup>  
909 ;*Gli3*<sup>-/-</sup> samples and fold change of WT over *Shh*<sup>-/-</sup>;*Gli3*<sup>-/-</sup>.

910

911 **Figure 5-Source Data 1. Stable and HH-responsive GLI binding regions with limb**  
912 **enhancer activity in the VISTA dataset.** Columns indicate VISTA enhancer IDs,  
913 coordinates, number of tissues with limb enhancer activity as annotated by the VISTA  
914 database (Visel et al. 2007) and its corresponding GBR category.

915

916 **Figure 5-Source Data 2. NIH3T3 H3K27ac ChIP-seq analyzed data and called**  
917 **peaks.** H3K27ac called peaks with a FDR <0.05 from two replicates of purmorphamine  
918 (“pm”) treated or DMSO control NIH3T3 cells. For each peak, the assigned Peak ID,  
919 coordinates, peak type, fold change normalized to input for purmorphamine treated and  
920 control samples, and fold change of purmorphamine treated over control are listed.  
921 Additional tabs include sorted files for each peak type.

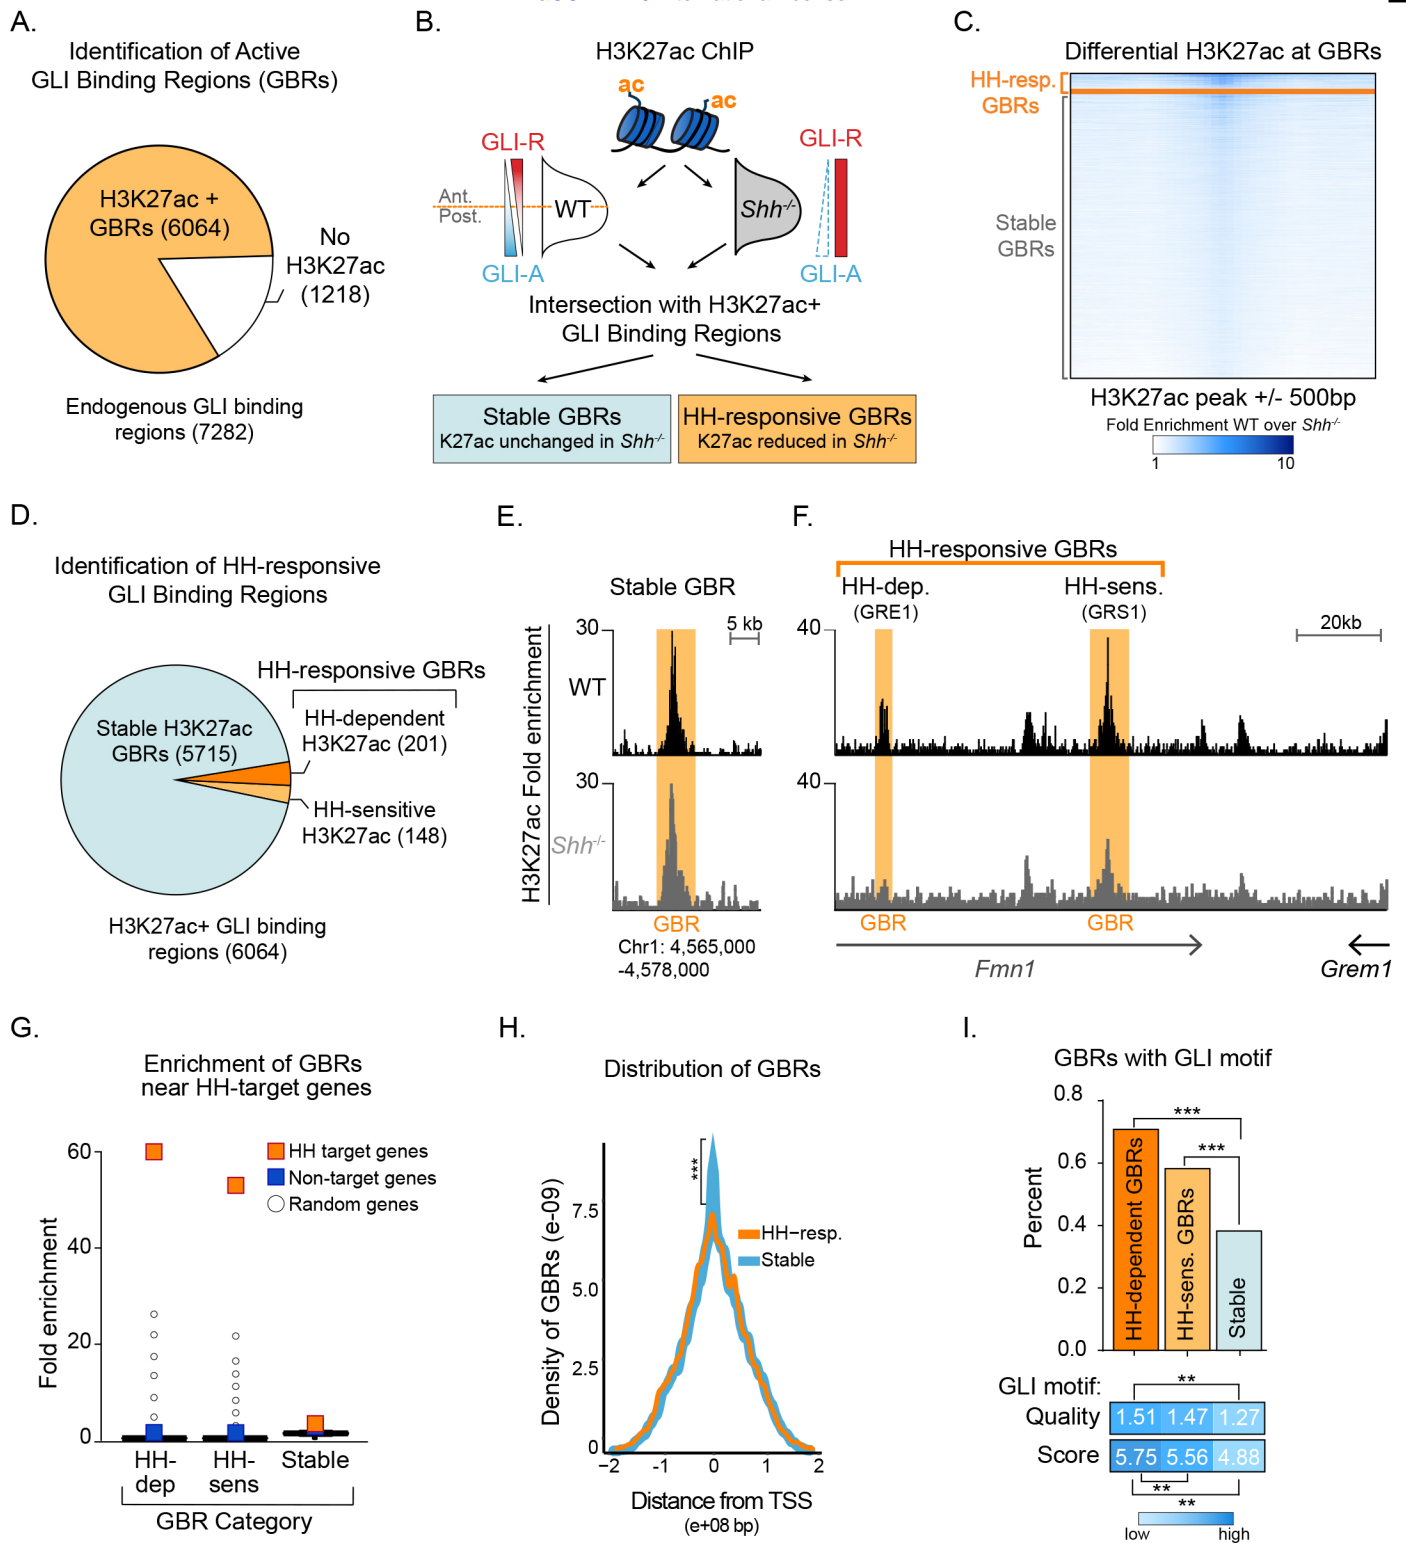

**Figure 1. Hedgehog signaling regulates acetylation of H3K27 at a subset of GLI binding regions.** A. Intersection of endogenous GLI3 and H3K27ac binding regions in WT E10.5 limb buds (n=2). B. Pipeline for identifying different categories of GLI bound regions. C. Heatmap depicting differential H3K27ac enrichment in WT over *Shh*<sup>-/-</sup> limb buds for HH-responsive and Stable GBRs. D. Classification of GBR categories from E10.5 GBRs with H3K27ac in WT limbs. E-F. H3K27ac enrichment in WT and *Shh*<sup>-/-</sup> is shown across a representative genomic region near a Stable GBR (E) and two biologically validated HH-responsive GBRs: GRE1 (Li et al. 2014) and GRS1 (Zuniga et al. 2012) at the HH target gene *Grem1* (F). G. HH-dependent GBRs, HH-responsive GBRs and Stable GBRs are significantly enriched near HH target genes compared to randomly chosen genes ( $p=0$   $p=0$ , and  $p=0$  respectively permutation test based on 10,000 permutations). H. Distribution of Stable and HH-responsive GBRs arounds transcription start sites (TSS), indicating significant enrichment of Stable GBRs (63%) at TSS compared to HH-responsive GBRs (26%) ( $p=2.55e-40$ , Fisher exact test (two sided)). I. Both HH-dependent and HH-sensitive GBRs have significantly more GLI motifs than Stable GBRs (top) ( $p=2.2e-16$  and  $p=8.00e-06$ ; one-sided proportional test). GBRs containing GLI motifs have significantly more motifs per GBR within HH-dependent GBRs than Stable GBRs ( $p=5.92e-06$ ; one-sided Wilcoxon test) and the quality of GLI motifs is significantly higher for HH-dependent and HH-sensitive GBRs than Stable GBRs ( $p=5.03e-13$  and  $p=5.98e-08$ ; one-sided Wilcoxon test). See Figure 1-Figure Supplement 1, Figure 1-Source Data 1, Figure1-Source Data 2. Figure 1-Source Data 3.



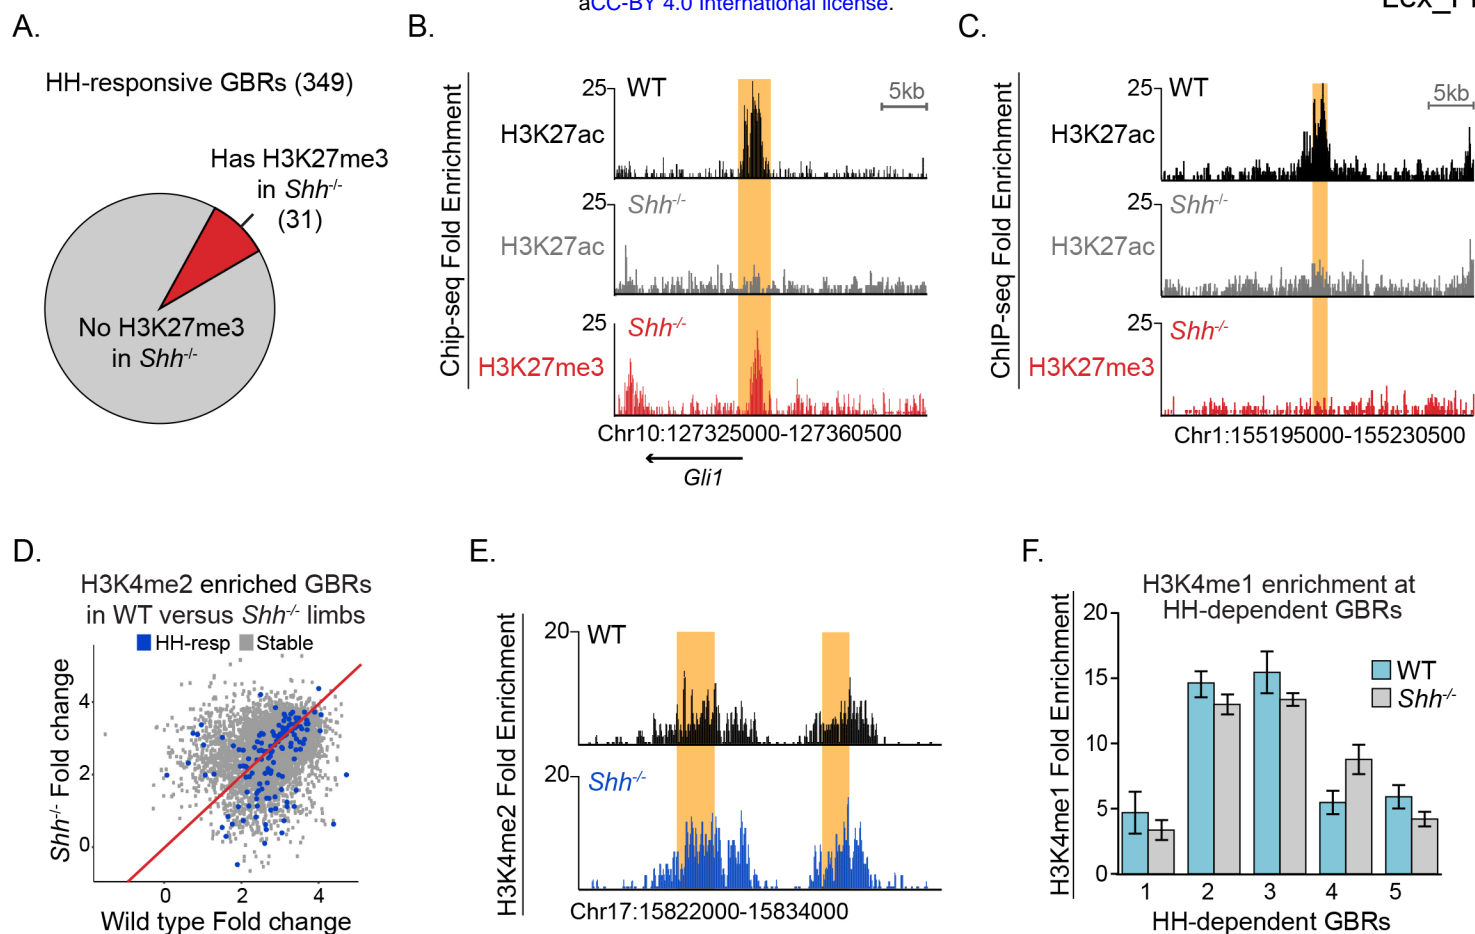

**Figure 2. Most HH-responsive GBRs are not regulated by Polycomb repression and retain markers of poised enhancers.**

A. Chart depicts HH-responsive GBRs that contain enrichment for the PRC2 marker H3K27me3 in *Shh*<sup>-/-</sup> limb buds (n=2). B. Tracks depicting a HH-responsive region in *Gli1* with differential H3K27ac enrichment in WT and *Shh*<sup>-/-</sup> limb buds and H3K27me3 enrichment in *Shh*<sup>-/-</sup> limb buds. C. Tracks depicting a representative HH-dependent GBR that also lacks H3K27me3. D. Scatter plot for H3K4me2 enrichment of Stable and HH-responsive GBRs from WT and *Shh*<sup>-/-</sup> limb buds (n=2). No GBRs show significant changes in di-methylation of H3K4 between WT and *Shh*<sup>-/-</sup>. E. Representative track showing comparable levels of H3K4me2 enrichment for a HH-responsive GBR in WT and *Shh*<sup>-/-</sup> limb buds. F. Quantitative-PCR assays indicating H3K4me1 ChIP enrichment in WT and *Shh*<sup>-/-</sup> limb buds at HH-dependent GBRs (n=2). See Figure 2-Figure Supplement 1, Figure 2-Source Data 1, Figure 2-Source Data 2, Figure 2-Source Data 3.

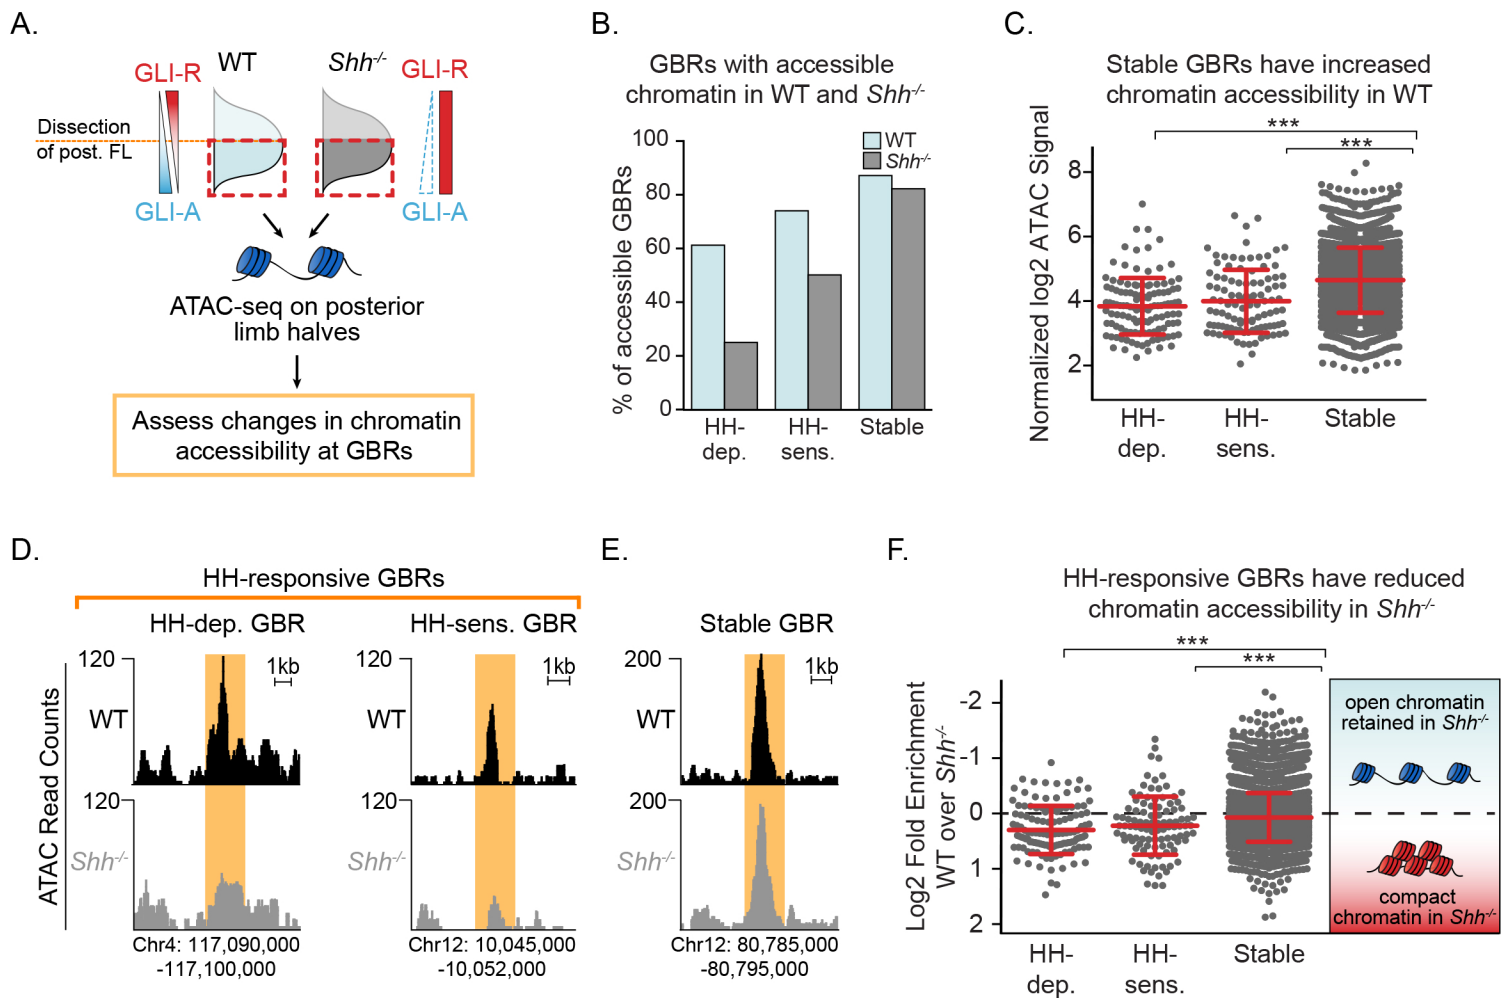

**Figure 3. Chromatin accessibility is reduced in the absence of Hedgehog signaling.** A. ATAC-seq pipeline for single pairs of dissected posterior halves of forelimbs (n=2). ATAC peaks, signifying accessible chromatin regions were intersected with Stable GBRs and HH-responsive GBRs. B. Many HH-responsive GBRs that are accessible in WT limb buds are inaccessible *Shh*<sup>-/-</sup> limb buds, while the accessibility of Stable GBRs remain largely unchanged. C. Plot of log<sub>2</sub> fold changes in chromatin accessibility in WT limbs indicating that Stable GBRs are more accessible than HH-dependent and HH-responsive GBRs ( $p=3.98e-19$ ,  $p=9.21e-11$ ; Wilcoxon rank sum test). Each data point represents a single GBR and red bars indicate the median, upper and lower quartiles. D-E. Representative ATAC-seq peaks showing lack of accessibility in *Shh*<sup>-/-</sup> limb buds at HH-responsive GBRs (D), but not in Stable GBRs (E). F. Plot of log<sub>2</sub> fold changes in chromatin accessibility in the presence and absence of HH signaling. HH-responsive GBRs are significantly less accessible than Stable GBRs (Stable vs. HH-sensitive.  $p=0.001$ ; Stable vs. HH-dependent  $p=4.99e-09$ ; Wilcoxon rank sum test). See Figure 3-Source Data 1.

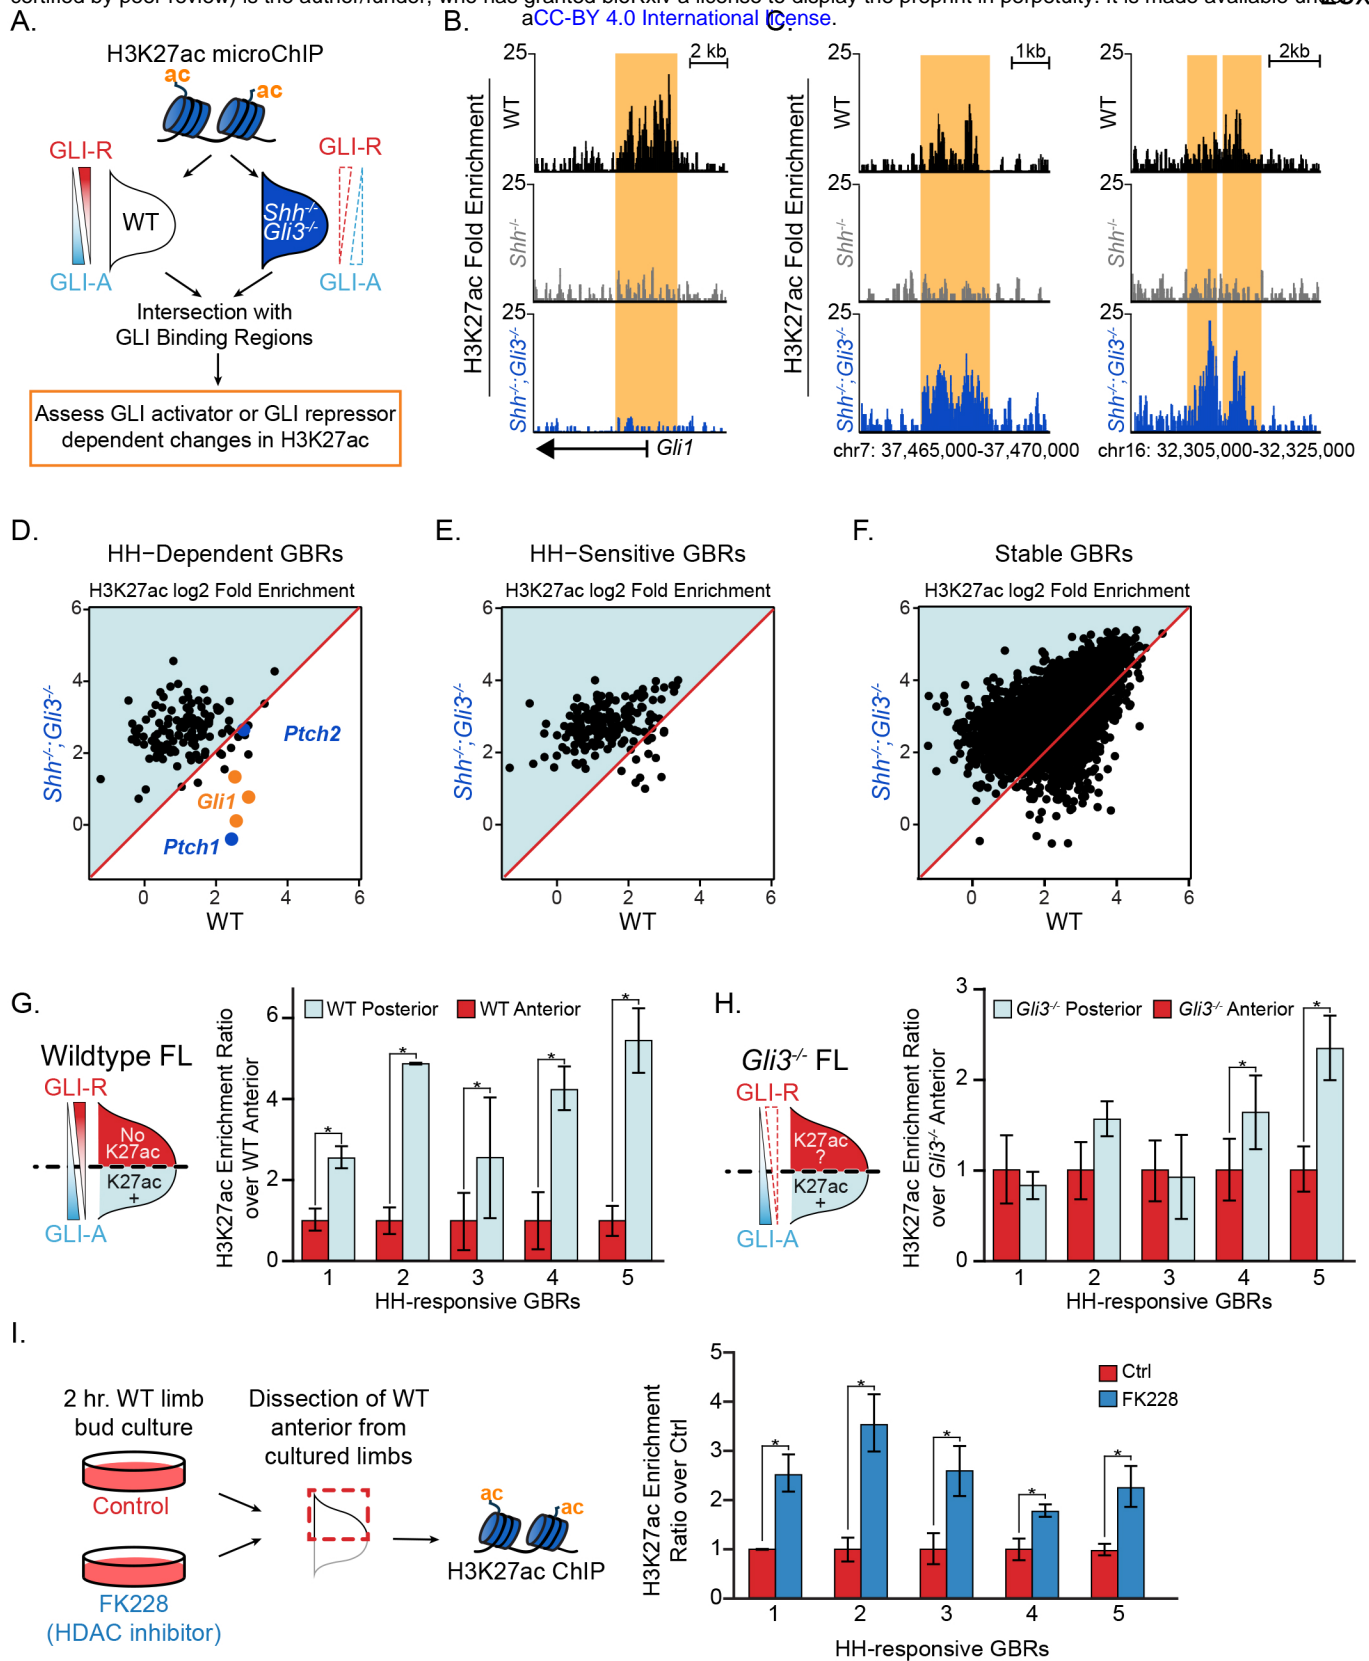

**Figure 4. GLI de-repression activates most HH-responsive enhancers.** A. *Shh<sup>-/-</sup>; Gli3<sup>-/-</sup>* H3K27ac ‘MicroChIPs’ on single pairs of E10.5 forelimbs (33-34S) *Shh<sup>-/-</sup>; Gli3<sup>-/-</sup>* and WT littermate controls (n=2, respectively). B. A HH-responsive GBR near *Gli1* which requires GLI activator for H3K27ac enrichment. Representative examples of HH-responsive GBRs, activated by loss of GLI repressor that do not require GLI activator. D-F. Scatter plot of H3K27ac enrichment of HH-dependent, HH-sensitive and Stable GBRs in WT and *Shh<sup>-/-</sup>; Gli3<sup>-/-</sup>* limbs. Each dot represents a single GBR. The p-values indicate a significant enrichment of acetylation in *Shh<sup>-/-</sup>; Gli3<sup>-/-</sup>* among all GBR classes (Wilcoxon-rank sum tests). G-H. E10.5 WT and *Gli3<sup>-/-</sup>* limb buds were dissected into anterior and posterior halves as indicated and selected HH-dependent GBRs were tested for H3K27ac enrichment by quantitative PCR in each fraction (n=4). HH-dependent GBRs have higher ratios of posterior to anterior H3K27ac enrichment in WT limb buds (G) while most HH-dependent GBRs have equal ratios of posterior to anterior H3K27ac enrichment in *Gli3<sup>-/-</sup>* limb buds (H) (Asterisks indicate p<0.05, paired T-test). I. Inhibition of HDAC 1/2 using 250nM of FK228 in cultured limb buds for two hours resulted in significant increases of H3K27ac enrichment in anterior cultured limb buds compared to control anterior limbs (n=4; asterisks indicate p<0.05; paired T-test). See Figure 4-Figure Supplement 1, Figure 4-Source Data1.

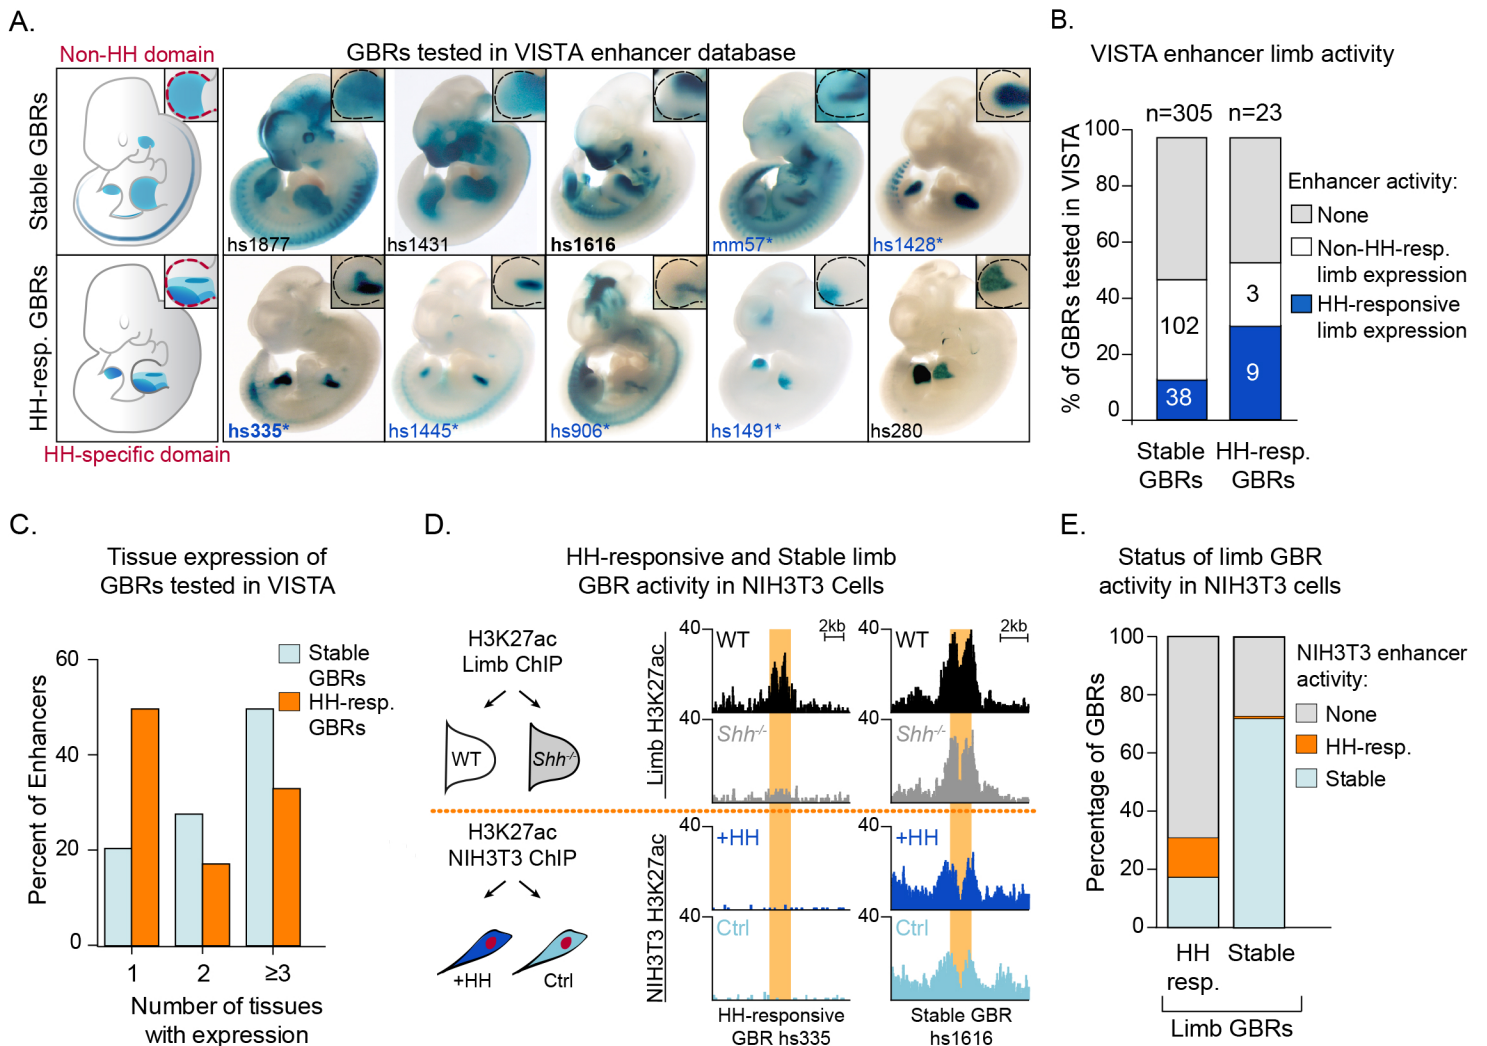

**Figure 5. Hedgehog-responsive GBRs have tissue-specific enhancer activity within HH-specific domains.** A. Enhancers with annotated limb activity in VISTA corresponding to representative HH-responsive GBRs (bottom) and Stable GBRs (top) with limbs magnified and outlined in insets. Limb buds containing HH-specific domains of enhancer activity are indicated by an asterisk. B. Chart indicating total number of VISTA enhancers tested for HH-responsive and Stable GBRs, the numbers of enhancers for each category and their limb enhancer activity. C. Chart delineating the percentage of HH-responsive and Stable limb enhancers that drive expression in one or more tissues. D. Schematic of NIH3T3 H3K27ac ChIP treated with and without the HH agonist purmorphamine (+HH) and the activity of representative HH-responsive and Stable limb GBRs in response to HH activation in limb and NIH3T3 cells (n=2). E. Graph indicating how the acetylation status of HH-responsive and Stable limb GBRs responds to HH signaling in HH-responsive NIH3T3 cells. See Figure 5-Source Data 1, Figure 5-Source Data 2.

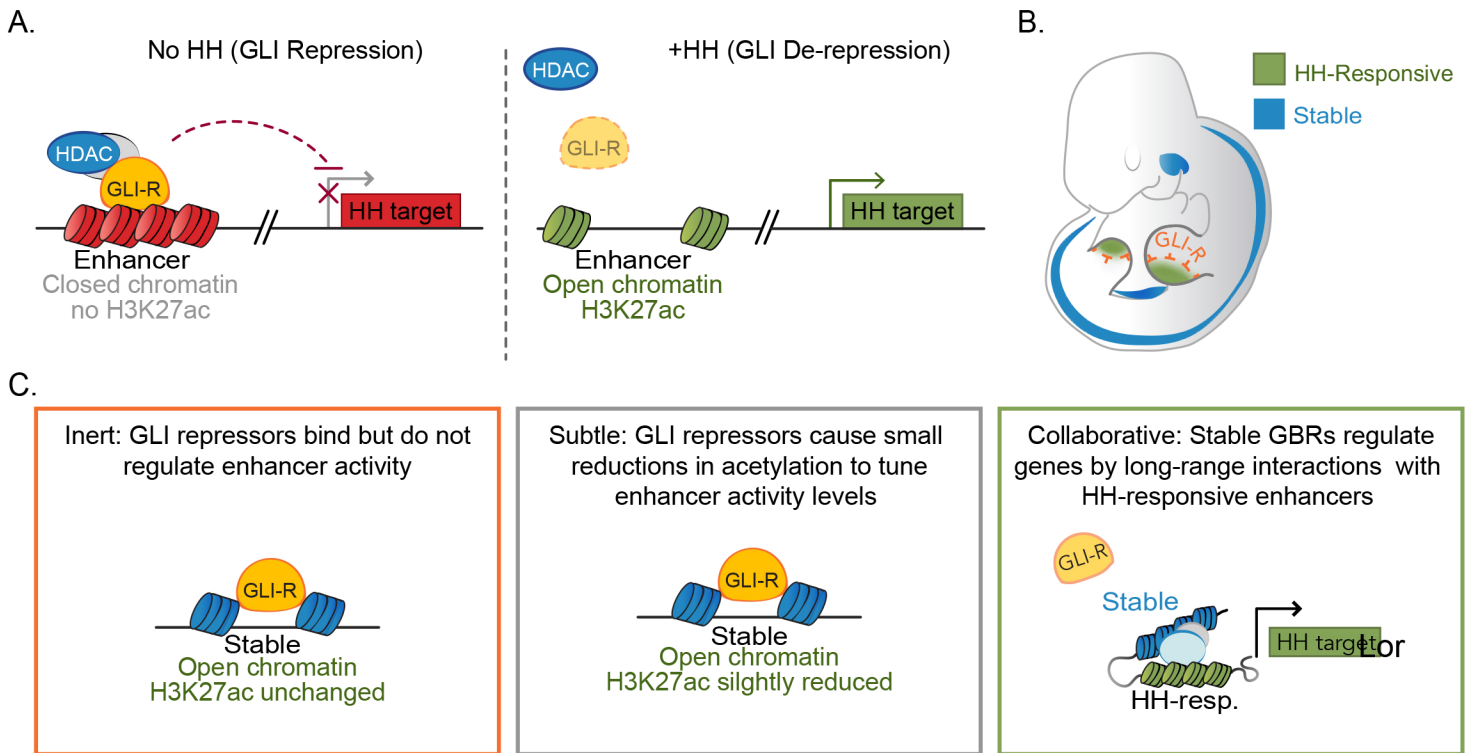

**Figure 6. Model for GLI transcriptional repression.** A. In the absence of HH, GLI repressors bind to enhancers for HH target genes, limiting their accessibility and recruiting an HDAC complex that de-acetylates Histone H3K27, inactivating the enhancer. In the presence of HH signaling, GLI de-repression and loss of associated HDAC activity result in increased accessibility, the accumulation of H3K27ac and gene transcription. B. Schematic showing tissue-restricted activity of HH-responsive GBRs within HH-responsive gene expression domains. C. Possible roles for Stable GBRs in HH transcriptional regulation.

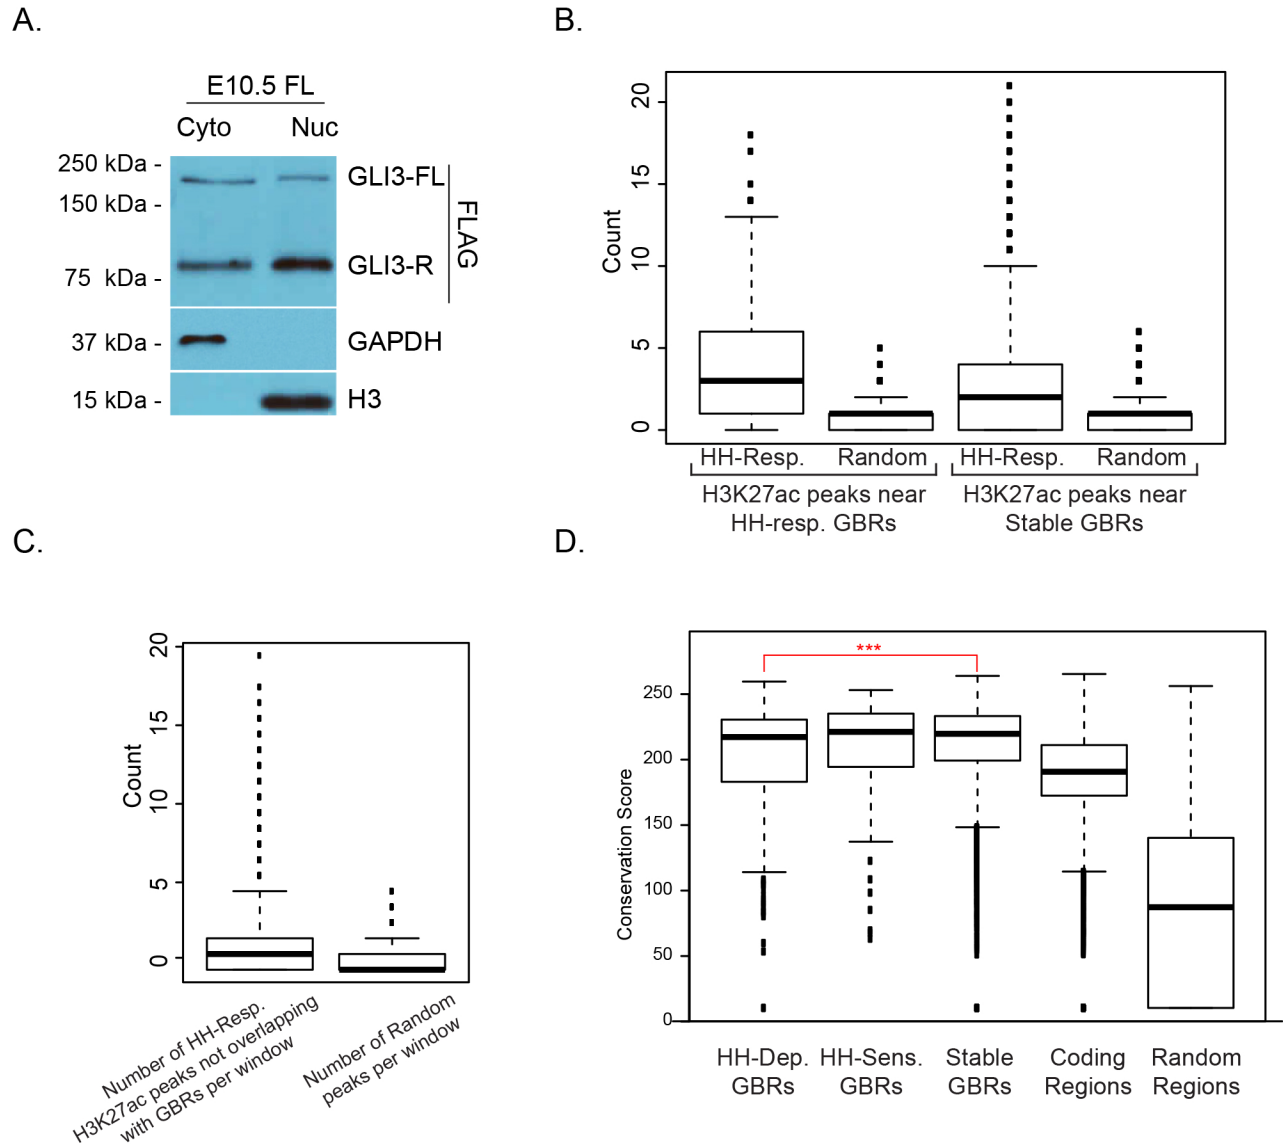

**Figure 1-Figure Supplement 1. Nuclear localization of GLI3 and properties of GLI binding regions.** A. Western blots from E10.5 limb buds indicating the distribution of endogenous GLI3-Flag in cytoplasmic and nuclear fractions (n=4). B. Hedgehog-responsive enhancers that are not bound by GLI are clustered near GLI binding regions. Box plot indicates the proximity of HH-responsive H3K27ac peaks that are not bound by GLI to either HH-Responsive GBRs or Stable GBRs compared to random peaks. For both HH-responsive and stable GBRs, the number of HH-Responsive non-GBR H3K27ac peaks is significantly larger than the number of random regions (Wilcoxon-test p-value = 0). C. HH-responsive peaks not bound by GLI3 are clustered together. The genome was split into 100,000 base-pair non-overlapping windows and the number of HH-responsive H3K27ac peaks that are not bound by GLI3 were counted as well as the number of random peaks. Only windows that overlapped with at least one HH-responsive H3K27ac peak or random peak were considered. The two counts are significantly different (Wilcoxon-test p-value = 0). The dark black line indicates the median. The lower boundary of the box indicates the first quartile, while the upper boundary of the third box is the third quartile. The circles indicate outliers. D. Box plot showing the conservation scores for different classes of GBRs. The conservation scores correspond to phastCons values linearly scaled from 0 to 255. HH-responsive GBRs have significantly lower conservation scores than stable GBRs (p-value = 0.0001134492, one sided Wilcoxon test). None of the other pairs of GBRs are significantly different from each other. 'Coding regions' represent conservation scores for all protein coding genes in the mouse mm10 genome while 'Random regions' represent conservation scores for a set of 1000 random genomic loci that do not overlap with any gene. The dark black line indicates the median. The lower boundary of the box indicates the first quartile, while the upper boundary of the third box is the third quartile. The circles indicate outliers.

A. Could GLI repressors facilitate H3K27Me3 promoter recruitment?

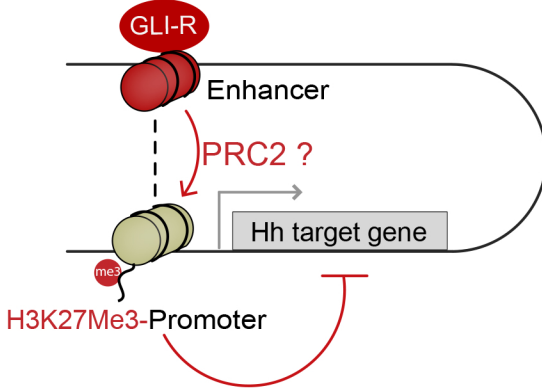

B. H3K27me3 enrichment at the promoters of HH-responsive genes associated with HH-dependent GBRs

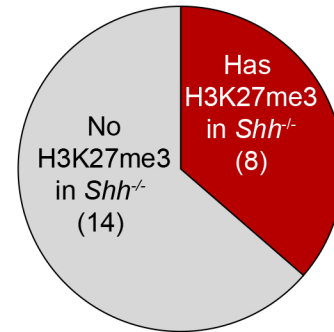

**Figure 2-Figure Supplement 1. H3K27Me3 enrichment at the promoters of GLI target genes.** A. Schematic illustrating a hypothetical mechanisms by which GLI repressors bound to distal enhancers could facilitate the deposition of PRC2-marked H3K27Me3 at the promoters of target genes. B. H3K27Me3 enrichment within the promoters of 22 HH responsive genes that also have HH-dependent GBRs (Figure 2-Source Data 2) was determined as for the enhancers except that the reads were summed in gene promoters instead of peak regions within a window spanning from 1500 bp upstream to 500 bp downstream of the transcriptional start site. H3K27Me3 enrichment was present in the promoters of 8/22 target genes.

A.

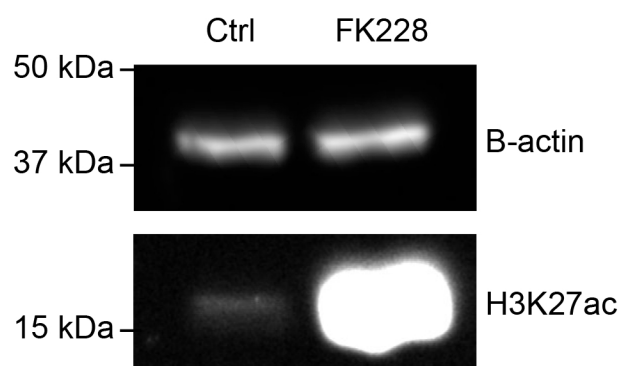

**Figure 4-Figure Supplement 1. H3K27ac is increased upon HDAC inhibition.** A. Western blot of cultured limb buds treated with DMSO or the HDAC1/2 inhibitor, FK228 (250nM) for 2 hours showing increased overall levels of H3K27 acetylation (n=2). Note that these are whole limb buds rather than anterior and posterior fractions shown in Figure 5.
